# Supplementary material for: An improved and convenient new synthesis of the pheromone components of the tomato leafminer Tuta absoluta
Source: Royal Society of Chemistry journal article supplement (doi:10.1039/d5ra05956a), 2025-01-01

## Supplementary Information

### **An Improved and Convenient New Synthesis of the Pheromone Components of the Tomato Leafminer *Tuta absoluta***

Shuai Yang,<sup>a</sup> Yan Cai,<sup>a</sup> and Zhiwei Miao<sup>\*a,b</sup>

<sup>a</sup> State Key Laboratory and Institute of Elemento-Organic Chemistry, College of Chemistry, Nankai University, Weijin Road 94, Tianjin 300071, P. R. China.

<sup>b</sup> Department of Ecological and Resources Engineering, Fujian Key laboratory of Eco-Industrial Green Technology, Wuyi University, Wuyishan, Fujian 354300, P. R. China.

E-mail: miaoziwei@nankai.edu.cn

#### **Table of Contents**

|                                                                                                          |     |
|----------------------------------------------------------------------------------------------------------|-----|
| <b>I. Supplementary Methods</b> .....                                                                    | S2  |
| <b>II. Summaries of Previous Syntheses</b> .....                                                         | S2  |
| <b>III. Synthesis of (<i>E</i>)-8-hydroxyoct-3-en-1-yl acetate(9b) by olefin cross-metathesis.</b> ..... | S5  |
| <b>IV. Experimental Procedures.</b> .....                                                                | S7  |
| <b>V. <sup>1</sup>H and <sup>13</sup>C NMR spectra for compounds</b> .....                               | S20 |
| <b>VI. Gas chromatography and HRMS of compounds 1 and 2</b> .....                                        | S33 |

## I. Supplementary Methods

Reagents were purchased at the highest commercial quality and used without further purification, unless otherwise stated. Reactions were magnetically stirred and monitored by thin-layer chromatography (TLC) carried out on 0.25 mm Leyan silica gel plates silica gel plates (GF254) using UV light as visualizing agent, and an water solution of  $K_2CO_3$  and  $KMnO_4$ . Leyan silica gel (60, particle size 300-400 mesh) was used for flash column chromatography. NMR spectra were recorded on Bruker 400 MHz instrument. Gas chromatography (GC) using Agilent 8860 series with HP-5 column ( $30\text{ m} \times 320\text{ }\mu\text{m} \times 0,25\text{ }\mu\text{m}$ ).

## II. Summaries of Previous Syntheses

a). M. Puigmartí, M. P. Bosch and A. Guerrero. *Synthesis*, **2015**, 47, 961–968. (C5+C5+C4 strategy).

### Pheromone 1

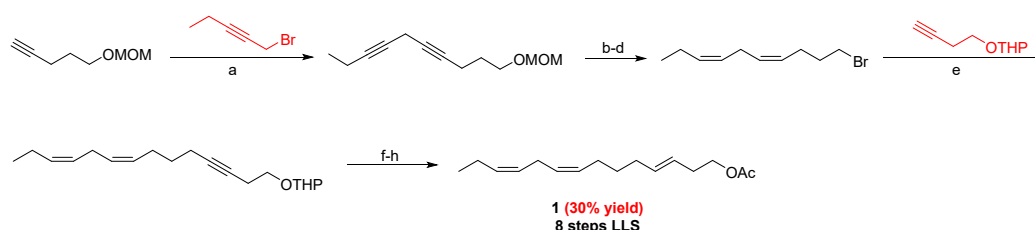

Key: (a) *i*-PrMgCl, CuBr·Me<sub>2</sub>S, 0 °C; (b) H<sub>2</sub>, Lindlar catalyst, quinoline, r.t; (c) 6 M HCl aq, reflux; (d) NBS, Ph<sub>3</sub>P, 0 °C to r.t; (e) *n*-BuLi, HMPA, -65 °C to r.t; (f) NaNH<sub>3</sub>, -35 °C; (g) PTSA, r.t; (h) Ac<sub>2</sub>O, Et<sub>3</sub>N, DMAP, r.t.

### Pheromone 2

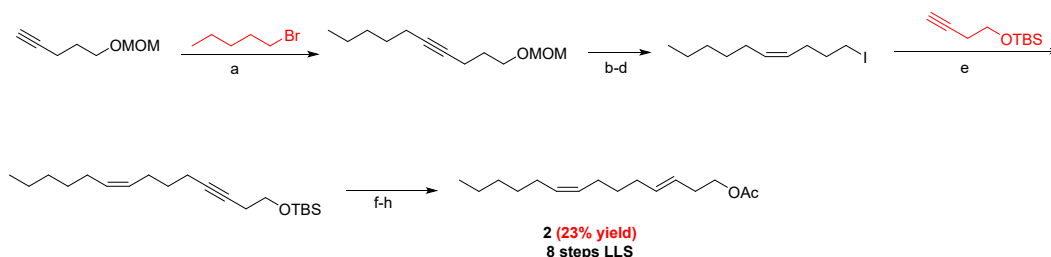

Key: (a) *n*-BuLi, HMPA, -70 °C to r.t; (b) 6 M HCl aq, reflux; (c) H<sub>2</sub>, Lindlar catalyst, quinoline, r.t; (d) I<sub>2</sub>, Ph<sub>3</sub>P, imidazole, 0 °C; (e) *n*-BuLi, HMPA, -65 °C to r.t; (f) NaNH<sub>3</sub>, -35 °C; (g) TBAF, r.t; (h) Ac<sub>2</sub>O, Et<sub>3</sub>N, DMAP, r.t.

b) J. A. Cabezas. *Tetrahedron Letters*, **2019**, 60, 407–410. (C4+C1+C9 strategy)

G. Eric, G. Loic and G. Olivier, PCT. Pat., WO2022171965, 2022.

### Method A

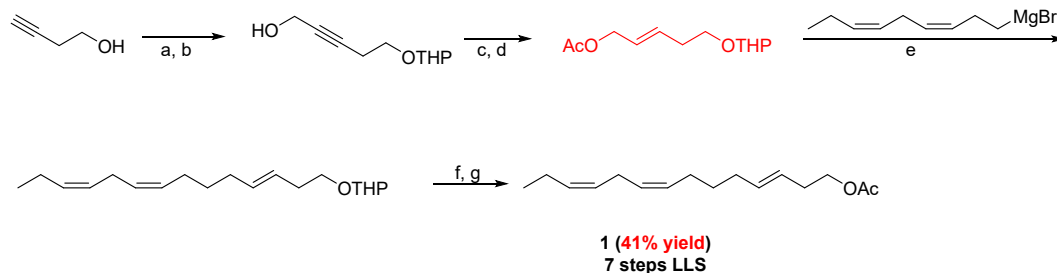

Key: (a) DHP, *p*-TSA, r.t; (b) *n*-BuLi, (CH<sub>2</sub>O)<sub>n</sub>, -78 °C to r.t; (c) LiAlH<sub>4</sub>, diglyme, 140 °C; (d) Ac<sub>2</sub>O, pyridine, r.t; (e) Li<sub>2</sub>CuCl<sub>4</sub>, -78 °C to r.t; (f) PTSA/EtOH, 60 °C; (g) Ac<sub>2</sub>O, Et<sub>3</sub>N, DMAP, r.t.

### Method B

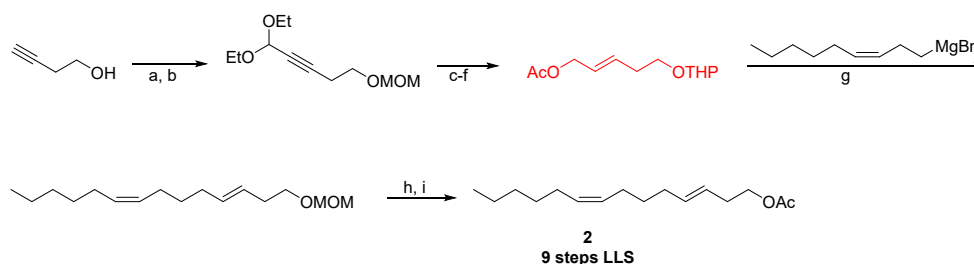

Key: (a) CH<sub>2</sub>(CH<sub>3</sub>)<sub>2</sub>, *p*-TSA, LiBr, r.t; (b) CH<sub>3</sub>MgCl, CH(OEt)<sub>3</sub>, 50 °C to 90 °C; (c) H<sub>2</sub>, Lindlar catalyst, quinoline, r.t; (d) 1 M HCl aq, r.t; (e) NaBH<sub>4</sub>, 0 °C to r.t; (f) Ac<sub>2</sub>O, pyridine, r.t; (g) Li<sub>2</sub>CuCl<sub>4</sub>, -78 °C to r.t; (h) HCl aq, reflux;; (i) Ac<sub>2</sub>O, pyridine, r.t.

c) K. Dong et al, *Tetrahedron Letters*, **2022**, 107, 153928. (C6+C2+C6 strategy)

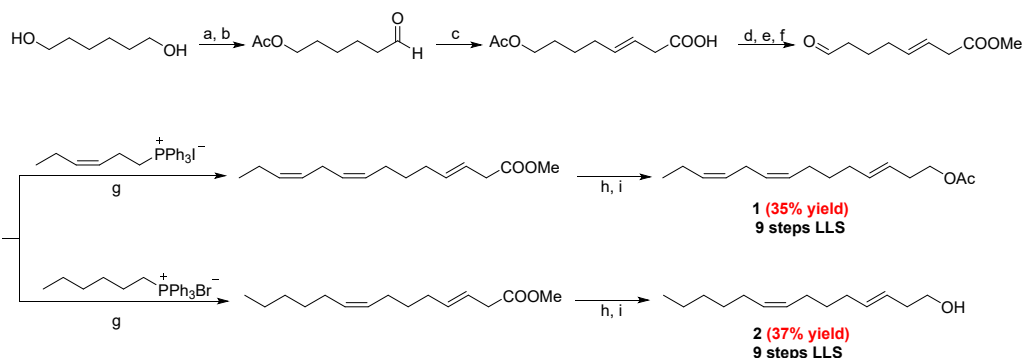

Key: (a) EtOAc, ion-exchange resins, 80 °C; (b) [Cu(MeCN)<sub>4</sub>]OTf, bpy, TEMPO, N-methyl imidazole, O<sub>2</sub>, rt; (c) CH<sub>2</sub>(COOH)<sub>2</sub>, piperidinium acetate, DMSO, 85 °C; (d) NaOH, 50 °C; (e) H<sub>2</sub>SO<sub>4</sub>, MeOH, reflux; (f) [Cu(MeCN)<sub>4</sub>]OTf, bpy, TEMPO, N-methyl imidazole, O<sub>2</sub>, rt; (g) KN[Si(Me)<sub>3</sub>]<sub>2</sub>, 78 °C; (h) LiAlH<sub>4</sub>, rt; (i) Ac<sub>2</sub>O, DMAP, Et<sub>3</sub>N, rt.

d) D. M. Zubrytski et al, *Russ J Org Chem.*, 2017, **53**, 6, 813-823. (C8 + C1 + C5 strategy)

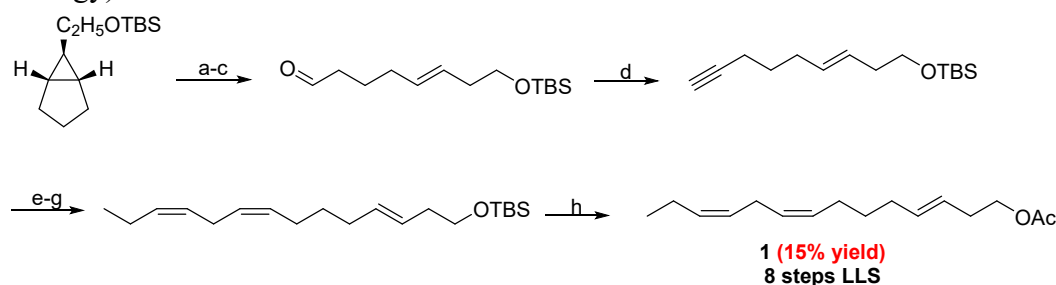

Key: (a) PhI(OAc)<sub>2</sub>, MeOH, rt; (b) *t*-BuMe<sub>2</sub>SiCl, ImH, DMF, 0 °C to rt; (c) DIBAL, toluene, -78 °C; (d) CBr<sub>4</sub>, Et<sub>3</sub>N, PPh<sub>3</sub>, -78 °C then *n*-BuLi, THF, -78 °C; (e) EtC≡CCH<sub>2</sub>Br, CuI, NaI, K<sub>2</sub>CO<sub>3</sub>, DMF, rt; (f) Ti[OPr-*i*]<sub>4</sub>, *i*-PrMgCl, Et<sub>2</sub>O, -78 °C to -41 °C; (g) 10% HCl; PPTS, EtOH, reflux. (h) AcCl, Et<sub>3</sub>N, Et<sub>2</sub>O, rt.

e) Y. Du, Y. Li, H. Guo, Y. Dong, Q. Shi and Z. Du, CN. Pat., CN119552076A, 2025. (C6 + C4 + C4 strategy)

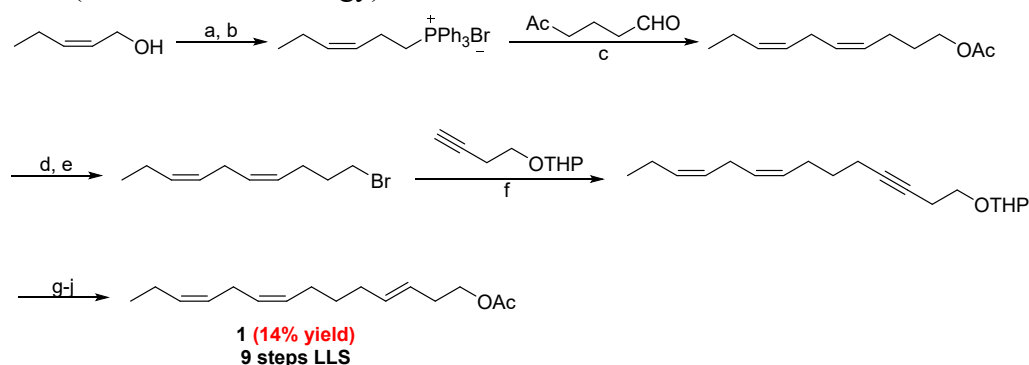

Key: (a) NBS, DCM, PPh<sub>3</sub>, -30 °C; (b) PPh<sub>3</sub>, toluene, 90 °C; (c) NaH, THF, -20 °C; (d) LiOH, MeOH, rt; (e) NBS, DCM, PPh<sub>3</sub>, -30 °C; (f) *n*-BuLi, THF, -20 °C to 0 °C; (g) LiAlH<sub>4</sub>, Et<sub>2</sub>O, rt; (h) *p*-TsOH, MeOH, rt; (i) Ac<sub>2</sub>O, pyridine, 0 °C.

f) Indian Institute of Science Education and Research (Iiser) Tirupati, IN Pat, IN202541011805A. 2025.

(C6 + C5 + C3 strategy)

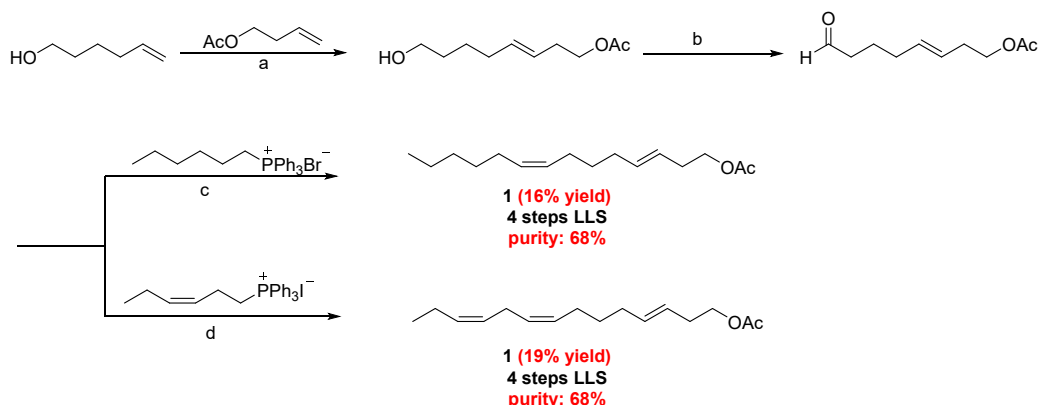

Key: (a) Grubbs II, DCM, rt; (b) DMP, DCM, 0 °C; (c) LiHMDS, THF, -78 °C to rt; (d) LiHMDS, THF, -78 °C to rt.

### III. Synthesis of (*E*)-8-hydroxyoct-3-en-1-yl acetate(9b) by olefin cross-metathesis.

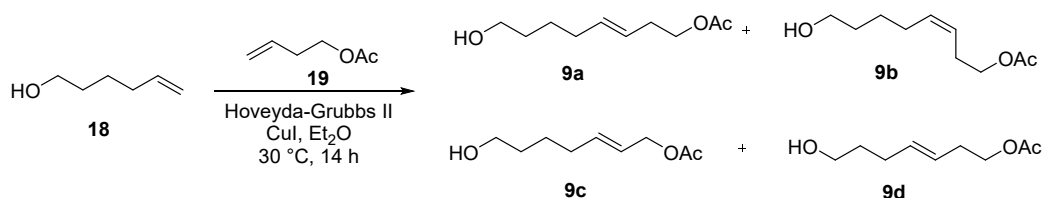

A dried flask under an N<sub>2</sub> atmosphere was charged with compound **18** (100 mg, 1.0 mmol, 1 equiv), compound **19** (570 mg, 5.0 mmol, 5 equiv) and CuI (10 mg, 0.05 mmol, 0.05 equiv) was added freshly distilled Et<sub>2</sub>O (5 mL, 0.2 M). The Hoveyda-Grubbs' second generation catalyst (63 mg, 0.1 mmol, 0.1 equiv) was added in one portion. The reaction mixture was allowed to stir at 30 °C for 14 h. The reaction mixture was allowed to cool ambient temperature, at which point it was concentrated in vacuo. The residue was subjected to flash column chromatography (SiO<sub>2</sub>: petroleum ether/ethyl acetate, 1:1) to furnish the mixture of **9a**, **9b**, **9c** and **9d**.

Gas chromatography (GC) of mixture of **9a**、**9b**、**9c** and **9d**.

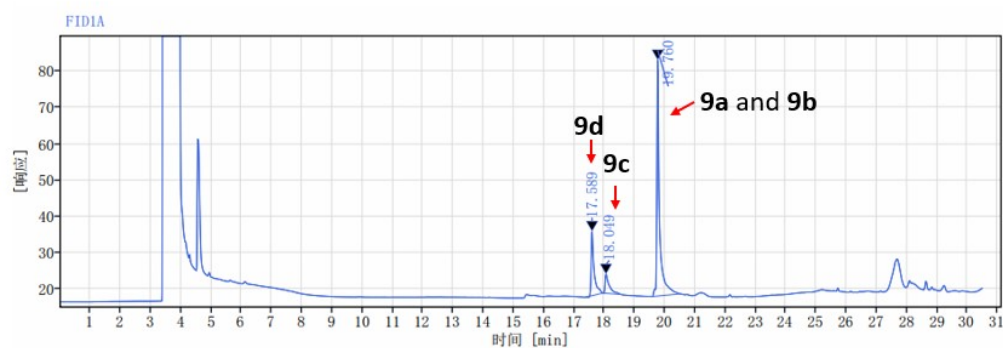

| 信号:        | FID1A |          |        |       |       |    |
|------------|-------|----------|--------|-------|-------|----|
| 保留时间 [min] | 类型    | 峰宽 [min] | 峰面积    | 峰高    | 峰面积%  | 名称 |
| 17.589     | MM m  | 0.57     | 114.78 | 17.72 | 20.35 |    |
| 18.049     | MM m  | 0.62     | 50.30  | 5.26  | 8.92  |    |
| 19.760     | BB    | 0.93     | 398.89 | 65.10 | 70.73 |    |
|            |       | 总和       | 563.97 |       |       |    |

$^{13}\text{C}$  NMR integration (120-140 ppm range) established the product ratio as  $5\text{a}:5\text{b}:5\text{c}:5\text{d} = 5:1:1.3:2$ .

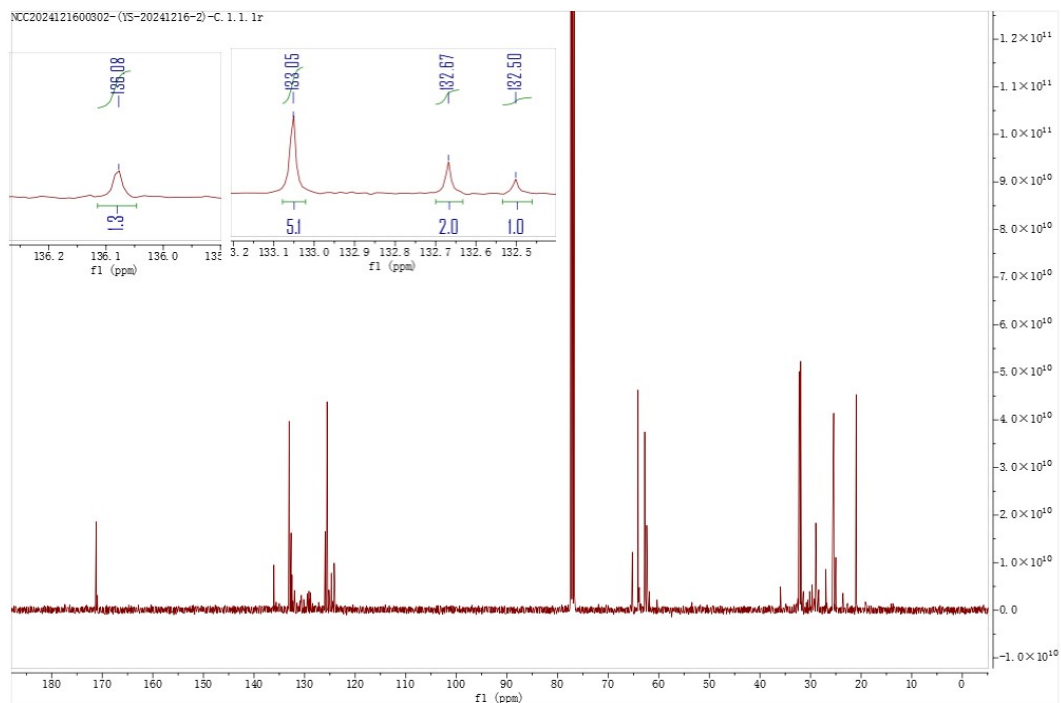

Quantitative analysis of a mixture of **9a**, **9b**, **9c**, and **9d** by  $^{13}\text{C}$  NMR (120-140 ppm range).



mmol, 62%).

**<sup>1</sup>H NMR (400 MHz, CDCl<sub>3</sub>)** δ 4.59 (dd, *J* = 4.5, 2.7 Hz, 1H), 3.86 (ddd, *J* = 11.1, 7.6, 3.4 Hz, 1H), 3.79 (dt, *J* = 9.6, 6.4 Hz, 1H), 3.56 – 3.50 (m, 1H), 3.47 (t, *J* = 6.8 Hz, 2H), 3.45 – 3.40 (m, 1H), 2.09 – 1.92 (m, 2H), 1.89 – 1.80 (m, 1H), 1.80 – 1.68 (m, 3H), 1.56 (tdd, *J* = 12.2, 6.8, 3.6 Hz, 4H).

**<sup>13</sup>C NMR (101 MHz, CDCl<sub>3</sub>)** δ 98.87, 66.48, 62.37, 33.75, 30.72, 29.84, 28.39, 25.46, 19.62.

**8-((tetrahydro-2H-pyran-2-yl)oxy)oct-3-yn-1-ol (6)**

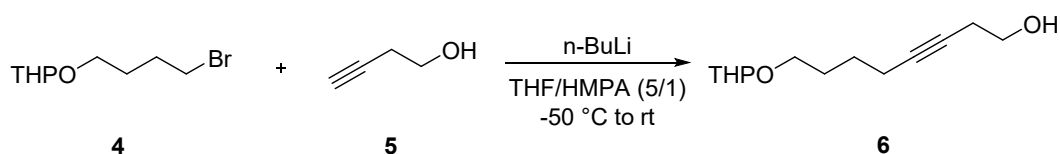

To a stirred -50 °C solution of 3-butyn-1-ol **5** (590 mg, 8.4 mmol, 2 equiv) in THF (20 mL) under N<sub>2</sub> atmosphere was added dropwise n-butyllithium (2.5 M in hexane, 6.7 mL, 4 equiv). The mixture was warmed to -30 °C and stirring was continued for 2 h. A solution of compound **4** (1 g, 4.2 mmol, 1 equiv) in HMPA (5 mL) was added to the reaction. The mixture was warmed to room temperature and stirring was continued for 4 h. The reaction was quenched with saturated aqueous NH<sub>4</sub>Cl (40 mL) and extracted with ethyl acetate (2×40 mL). The combined organic extracts were washed with brine, dried (Na<sub>2</sub>SO<sub>4</sub>) and concentrated under reduced pressure. Purification by flash column chromatography on silica gel (SiO<sub>2</sub>: petroleum ether/ethyl acetate, 10:1 to 4:1) gave **6** (402 mg, 1.8 mmol, 42%) as a light-yellow



oil.

**<sup>1</sup>H NMR (400 MHz, CDCl<sub>3</sub>)** δ 4.59 (dd, *J* = 4.5, 2.8 Hz, 1H), 3.88 (ddd, *J* = 11.1, 7.5, 3.3 Hz, 1H), 3.78 (dt, *J* = 9.7, 6.5 Hz, 1H), 3.69 (t, *J* = 6.2 Hz, 2H), 3.56 – 3.48 (m, 1H), 3.43 (dt, *J* = 9.7, 6.3 Hz, 1H), 2.44 (tt, *J* = 6.2, 2.4 Hz, 2H), 2.23 (tt, *J* = 6.9, 2.4 Hz, 2H), 1.93 – 1.80 (m, 2H), 1.78 – 1.67 (m, 3H), 1.64 – 1.51 (m, 6H).

**<sup>13</sup>C NMR (101 MHz, CDCl<sub>3</sub>)** δ 98.87, 82.35, 67.05, 62.36, 61.37, 30.74, 28.94, 25.75, 25.48, 23.20, 19.64, 18.60.

**HRMS (ESI)** Calcd. for C<sub>13</sub>H<sub>22</sub>NaO<sub>3</sub><sup>+</sup>[M+Na]<sup>+</sup>:249.1461, Found: 249.1469.

**(*E*)-8-((tetrahydro-2H-pyran-2-yl)oxy)oct-3-en-1-ol (7)**

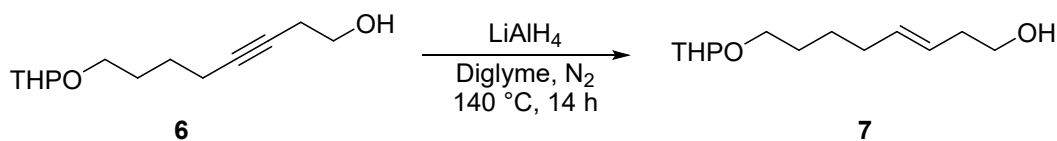

A solution of compound **6** (350 mg, 1.5 mmol, 1 equiv) in diglyme (10 mL) being cooled to 0 °C was added the LiAlH<sub>4</sub> (176 mg, 4.6 mmol, 3 equiv) under N<sub>2</sub> atmosphere. The mixture was warmed to 140 °C and stirring was continued for 12 h. The reaction was quenched with saturated aqueous NH<sub>4</sub>Cl (40 mL) and extracted with ethyl acetate (2×40 mL). The combined organic extracts were washed with brine, dried (Na<sub>2</sub>SO<sub>4</sub>) and concentrated under reduced pressure. Purification by flash column chromatography on silica gel (SiO<sub>2</sub>: petroleum ether/ethyl acetate, 4:1) gave **7** (267 mg, 1.2 mmol, 76%) as a light-yellow oil.

**<sup>1</sup>H NMR (400 MHz, CDCl<sub>3</sub>)** δ 5.63 – 5.53 (m, 1H), 5.48 – 5.35 (m, 1H), 4.59 (dd,

$J = 4.5, 2.8$  Hz, 1H), 3.88 (ddd,  $J = 11.0, 7.4, 3.3$  Hz, 1H), 3.76 (dt,  $J = 9.7, 6.8$  Hz, 1H), 3.64 (t,  $J = 6.3$  Hz, 2H), 3.59 – 3.49 (m, 1H), 3.41 (dt,  $J = 9.8, 6.6$  Hz, 1H), 2.36 – 2.23 (m, 2H), 2.08 (q,  $J = 7.0, 6.5$  Hz, 2H), 1.90 – 1.81 (m, 1H), 1.78 – 1.69 (m, 1H), 1.65 – 1.52 (m, 7H), 1.50 – 1.42 (m, 2H).

$^{13}\text{C}$  NMR (101 MHz,  $\text{CDCl}_3$ )  $\delta$  133.91, 126.16, 98.88, 67.45, 62.36, 62.05, 36.00, 32.45, 30.77, 29.24, 26.07, 25.50, 19.68.

HRMS (ESI) Calcd. for  $\text{C}_{13}\text{H}_{24}\text{NaO}_3^+[\text{M}+\text{Na}]^+$ : 251.1618, Found: 251.1614.

**(*E*)-8-((tetrahydro-2H-pyran-2-yl)oxy)oct-3-en-1-yl acetate (**8**)**

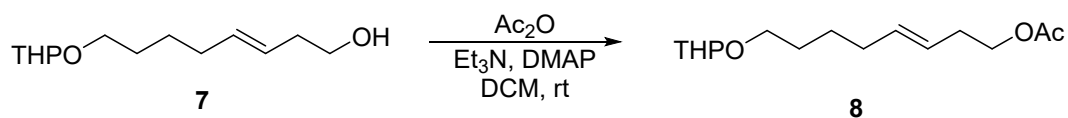

A solution of compound **7** (267 mg, 1.2 mmol, 1 equiv) and 4-(dimethylamino)pyridine (3 mg, 0.024 mmol, 0.02 equiv) in  $\text{CH}_2\text{Cl}_2$  (5 mL) being cooled to 0 °C was added the  $\text{Et}_3\text{N}$  (359 mg, 3.5 mmol, 3 equiv) and the acetic anhydride (239 mg, 2.3 mmol, 2 equiv). The mixture was warmed to room temperature and stirring was continued for 2 h. The reaction was quenched with  $\text{H}_2\text{O}$  (20 mL) and extracted with  $\text{CH}_2\text{Cl}_2$  (2×20 mL). The combined organic extracts were washed with brine, dried ( $\text{Na}_2\text{SO}_4$ ) and concentrated under reduced pressure. Purification by flash column chromatography on silica gel ( $\text{SiO}_2$ : petroleum ether/ethyl acetate, 10:1) gave **8** (303 mg, 1.1 mmol, 95%) as a light-yellow oil.

$^1\text{H}$  NMR (400 MHz,  $\text{CDCl}_3$ )  $\delta$  5.53 (dtt,  $J = 14.7, 6.6, 1.3$  Hz, 1H), 5.39 (dtt,  $J =$

15.1, 6.8, 1.3 Hz, 1H), 4.59 (dd,  $J = 4.5, 2.7$  Hz, 1H), 4.08 (t,  $J = 6.9$  Hz, 2H), 3.89 (td,  $J = 7.5, 3.6$  Hz, 1H), 3.75 (dt,  $J = 9.6, 6.8$  Hz, 1H), 3.57 – 3.48 (m, 1H), 3.40 (dt,  $J = 9.6, 6.6$  Hz, 1H), 2.33 (qd,  $J = 6.8, 1.2$  Hz, 2H), 2.06 (s, 5H), 1.84 (qt,  $J = 8.4, 3.6$  Hz, 1H), 1.73 (ddd,  $J = 12.0, 7.7, 4.3$  Hz, 1H), 1.65 – 1.50 (m, 6H), 1.45 (dtd,  $J = 10.1, 7.2, 4.0$  Hz, 2H).

$^{13}\text{C}$  NMR (101 MHz,  $\text{CDCl}_3$ )  $\delta$  171.13, 133.21, 125.39, 98.86, 67.44, 64.11, 62.33, 32.39, 31.94, 30.77, 29.20, 26.02, 25.50, 20.98, 19.67.

HRMS (ESI) Calcd. for  $\text{C}_{15}\text{H}_{26}\text{NaO}_4^+[\text{M}+\text{Na}]^+$ : 293.1723, Found: 293.1723.

**(*E*)-8-hydroxyoct-3-en-1-yl acetate (9a)**

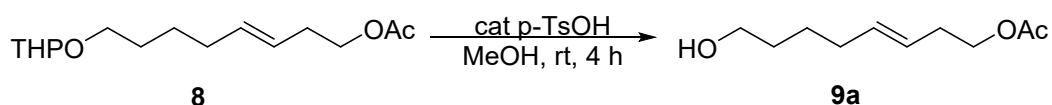

A solution of compound **8** (290 mg, 1.1 mmol, 1 equiv) in MeOH (8 mL) was added the *p*-toluenesulfonic acid (4 mg, 0.02 mmol, 0.02 equiv) at room temperature. After 13 h, TLC analysis (petroleum ether/ethyl acetate, 2:1) showed the complete consumption of compound **8**. The solvent was evaporated and diluted with  $\text{H}_2\text{O}$  (20 mL) and extracted with  $\text{CH}_2\text{Cl}_2$  (2×20 mL). The combined organic extracts were washed with brine, dried ( $\text{Na}_2\text{SO}_4$ ) and concentrated under reduced pressure. Purification by flash column chromatography on silica gel ( $\text{SiO}_2$ : petroleum ether/ethyl acetate, 3:1) gave **9b** (163 mg, 0.87 mmol, 82%) as a colorless oil.

**(*E*)-8-oxooct-3-en-1-yl acetate (10)**



To a stirred 0 °C solution of compound **11** (307 mg, 0.72 mmol, 2 equiv) in THF (20 mL) under N<sub>2</sub> atmosphere was added dropwise Potassium bis(trimethylsilyl) amide (1 M in THF, 0.72 mL, 2 equiv). The stirring was continued for 2 h and the mixture was cooled to -78 °C. A solution of compound **10** (67 mg, 0.36 mmol, 1 equiv) in THF (2 mL) was added to the reaction. The mixture was warmed to -50 °C for 2 h and 25 °C for another 2 h. The reaction was quenched with saturated aqueous NH<sub>4</sub>Cl (20 mL) and extracted with ethyl acetate (2×20 mL). The combined organic extracts were washed with brine, dried (Na<sub>2</sub>SO<sub>4</sub>) and concentrated under reduced pressure. Purification by flash column chromatography on silica gel (SiO<sub>2</sub>: petroleum ether/ethyl acetate, 20:1) gave **2** (72 mg, 0.29 mmol, 80%) as a light-yellow oil. GC purity: 97%.

**<sup>1</sup>H NMR (400 MHz, CDCl<sub>3</sub>)** δ 5.53 (dtt, *J* = 14.6, 6.6, 1.3 Hz, 1H), 5.46 – 5.30 (m, 3H), 4.08 (t, *J* = 6.9 Hz, 2H), 2.33 (qd, *J* = 6.8, 1.2 Hz, 2H), 2.06 (s, 3H), 2.03 (q, *J* = 7.1, 6.6 Hz, 6H), 1.43 (q, *J* = 7.5 Hz, 2H), 1.32 (tdd, *J* = 10.6, 6.9, 3.1 Hz, 6H), 0.91 (t, *J* = 6.8 Hz, 3H).

**<sup>13</sup>C NMR (101 MHz, CDCl<sub>3</sub>)** δ 171.11, 133.29, 130.31, 129.38, 125.31, 64.13, 32.16, 31.97, 31.52, 29.43(2C), 27.20, 26.63, 22.54, 20.97, 14.06.

**HRMS (ESI)** Calcd. for C<sub>16</sub>H<sub>28</sub>NaO<sub>2</sub><sup>+</sup>[M+Na]<sup>+</sup>:275.1982, Found: 275.1975.

**(3*E*,8*Z*,11*Z*)-tetradeca-3,8,11-trien-1-yl acetate (1)**

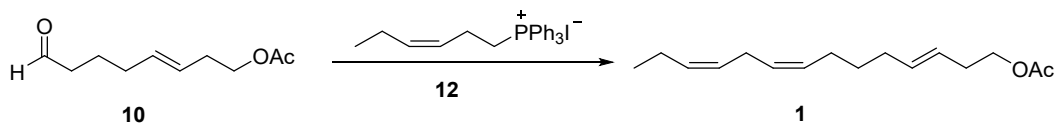

To a stirred 0 °C solution of compound **12** (253 mg, 0.53 mmol, 2 equiv) in THF (20 mL) under N<sub>2</sub> atmosphere was added dropwise Potassium bis(trimethylsilyl) amide (1 M in THF, 0.53 mL, 2 equiv). The stirring was continued for 2 h and the mixture was cooled to -78 °C. A solution of compound **10** (50 mg, 0.27 mmol, 1 equiv) in THF (2 mL) was added to the reaction. The mixture was warmed to -50 °C for 2 h and 25 °C for another 2 h. The reaction was quenched with saturated aqueous NH<sub>4</sub>Cl (20 mL) and extracted with ethyl acetate (2×20 mL). The combined organic extracts were washed with brine, dried (Na<sub>2</sub>SO<sub>4</sub>) and concentrated under reduced pressure. Purification by flash column chromatography on silica gel (SiO<sub>2</sub>: petroleum ether/ethyl acetate, 20:1) gave **1** (52 mg, 0.21 mmol, 78%) as a light-yellow oil. GC purity: 98%.

**<sup>1</sup>H NMR (400 MHz, CDCl<sub>3</sub>)** δ 5.47 (dt, *J* = 14.5, 6.5, 1.3 Hz, 1H), 5.43 – 5.08 (m, 5H), 4.02 (t, *J* = 6.9 Hz, 2H), 2.72 (t, *J* = 6.1 Hz, 2H), 2.27 (qd, *J* = 6.9, 1.2 Hz, 2H), 2.06 – 1.91 (m, 9H), 1.38 (p, *J* = 7.5 Hz, 2H), 0.93 (t, *J* = 7.6 Hz, 3H).

**<sup>13</sup>C NMR (101 MHz, CDCl<sub>3</sub>)** δ 171.04, 133.15, 131.77, 129.66, 128.34, 127.31, 125.39, 64.07, 32.12, 31.94, 29.28, 26.59, 25.51, 20.92, 20.51, 14.24.

**HRMS (ESI)** Calcd. for C<sub>16</sub>H<sub>26</sub>NaO<sub>2</sub><sup>+</sup>[M+Na]<sup>+</sup>:273.1825, Found: 273.1831.

**tert-butyl(hex-5-yn-1-yloxy)diphenylsilane (14)**

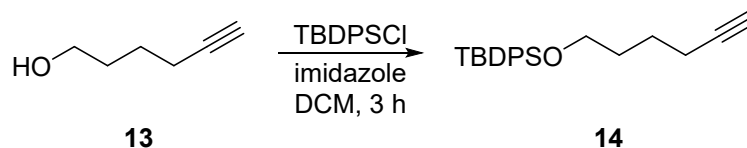

To a solution of 5-hexyn-1-ol (**13**) (2.0 g, 20.4 mmol, 1 equiv) and imidazole (2.1 g, 30.6 mmol, 1.5 equiv) in  $\text{CH}_2\text{Cl}_2$  (10 mL) being cooled to 0 °C was added the tert-butyldiphenylsilyl chloride (5.6 g, 20.4 mmol, 1 equiv). The reaction mixture was allowed to stirred at room temperature. After 3 h, TLC analysis (petroleum ether/ethyl acetate, 3:1) showed the complete consumption of compound **13**. The reaction was quenched with  $\text{H}_2\text{O}$  (30 mL) and extracted with  $\text{CH}_2\text{Cl}_2$  (2×30 mL). The combined organic extracts were washed with brine, dried ( $\text{Na}_2\text{SO}_4$ ) and concentrated under reduced pressure. Purification by flash column chromatography on silica gel ( $\text{SiO}_2$ : petroleum ether/ethyl acetate, 50:1) gave **14** (6 g, 17.8 mmol, 87%) as a colorless oil.

**$^1\text{H}$  NMR (400 MHz,  $\text{CDCl}_3$ )**  $\delta$  7.70 (dd,  $J = 7.8, 1.6$  Hz, 4H), 7.52 – 7.36 (m, 6H), 3.72 (t,  $J = 5.8$  Hz, 2H), 2.23 (dt,  $J = 6.7, 3.4$  Hz, 2H), 1.97 (t,  $J = 2.6$  Hz, 1H), 1.70 (qd,  $J = 6.4, 2.9$  Hz, 4H), 1.09 (s, 9H).

**$^{13}\text{C}$  NMR (101 MHz,  $\text{CDCl}_3$ )**  $\delta$  135.60, 134.02, 129.58, 127.65, 84.56, 68.30, 63.34, 31.58, 26.88, 24.97, 19.24, 18.21.

#### 8-((tert-butyldiphenylsilyl)oxy)oct-3-yn-1-ol (**15**)

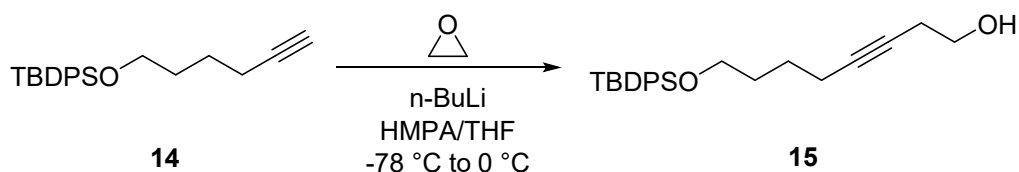

To a stirred -78 °C solution of compound **14** (1 g, 3.0 mmol, 1 equiv) in THF (20 mL) under N<sub>2</sub> atmosphere was added dropwise n-butyllithium (2.5 M in hexane, 1.4 mL, 1.2 equiv) followed by the addition of HMPA (5 mL). Ethylene oxide (3 M in THF, 10 mL, 10 equiv) was added after being stirred for 30 min at -78 °C. The mixture was warmed to 0 °C and stirring was continued for 5 h. The reaction was quenched with saturated aqueous NH<sub>4</sub>Cl (50 mL) and extracted with ethyl acetate (2×50 mL). The combined organic extracts were washed with brine, dried (Na<sub>2</sub>SO<sub>4</sub>) and concentrated under reduced pressure. Purification by flash column chromatography on silica gel (SiO<sub>2</sub>: petroleum ether/ethyl acetate, 50:1 to 4:1) gave **15** (500 mg, 1.3 mmol, 44%) as a light-yellow oil.

**<sup>1</sup>H NMR (400 MHz, CDCl<sub>3</sub>)** δ 7.70 (dd, *J* = 7.2, 2.3 Hz, 4H), 7.55 – 7.33 (m, 6H), 3.78 – 3.67 (m, 4H), 2.45 (ddd, *J* = 8.6, 6.2, 2.4 Hz, 2H), 2.20 (ddt, *J* = 6.7, 4.8, 2.4 Hz, 2H), 1.75 (s, 1H), 1.72 – 1.56 (m, 4H), 1.08 (s, 9H).

**<sup>13</sup>C NMR (101 MHz, CDCl<sub>3</sub>)** δ 135.59, 134.05, 129.57, 127.63, 82.56, 76.52, 63.45, 61.39, 31.74, 26.88, 25.43, 23.21, 19.23, 18.55.

**(*Z*)-8-(((tert-butyldiphenylsilyl)oxy)oct-3-en-1-ol (**16**)**

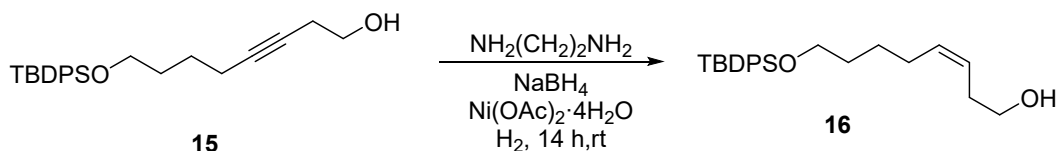

A solution of NaBH<sub>4</sub> (11 mg, 0.3 mmol, 0.38 equiv) in ethanol (10 mL) was added to a suspension of Ni(OAc)<sub>2</sub>·4H<sub>2</sub>O (31 mg, 0.13 mmol, 0.16 equiv) in ethanol (1.0



mL) in a H<sub>2</sub> atmosphere. After 30 min ethylenediamine (85 mg, 1.42 mmol, 1.8 equiv) was added to the suspension. After 30 min compound **15** (300 mg, 0.79 mmol, 1.0 equiv) in ethanol (10 mL) was also added. The reaction was then stirred for 16 h under H<sub>2</sub>. The mixture was filtered through a Celite pad, and the filtrate was concentrated to give the crude product. Purification by flash column chromatography on silica gel (SiO<sub>2</sub>: petroleum ether/ethyl acetate, 4:1) gave **16** (250 mg, 0.65 mmol, 81%) as a colorless oil.

**<sup>1</sup>H NMR (400 MHz, CDCl<sub>3</sub>)** δ 7.83 – 7.58 (m, 4H), 7.49 – 7.33 (m, 6H), 5.66 – 5.52 (m, 1H), 5.43 – 5.28 (m, 1H), 3.67 (dt, *J* = 14.3, 6.4 Hz, 4H), 2.40 – 2.28 (m, 2H), 2.09 (qd, *J* = 7.4, 1.6 Hz, 2H), 1.67 – 1.53 (m, 2H), 1.52 – 1.44 (m, 3H), 1.08 (s, 9H).

**<sup>13</sup>C NMR (101 MHz, CDCl<sub>3</sub>)** δ 135.61, 134.13, 133.28, 129.54, 127.61, 125.24, 63.76, 62.36, 32.17, 30.83, 27.09, 26.89, 25.91, 19.24.

**(Z)-8-((tert-butyldiphenylsilyl)oxy)oct-3-en-1-yl acetate (**17**)**

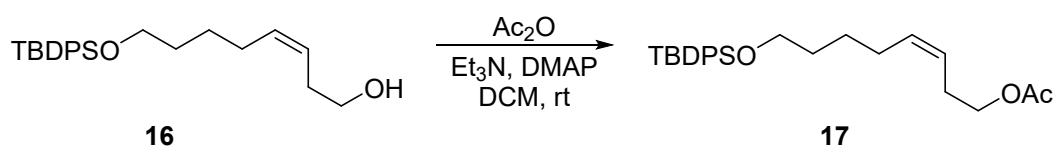

A solution of compound **16** (250 mg, 0.65 mmol, 1 equiv) and 4-(dimethylamino)pyridine (1.6 mg, 0.013 mmol, 0.02 equiv) in CH<sub>2</sub>Cl<sub>2</sub> (5 mL) being cooled to 0 °C was added the Et<sub>3</sub>N (197 mg, 1.9 mmol, 3 equiv) and the acetic anhydride (132 mg, 1.3 mmol, 2 equiv). The mixture was warmed to room



washed with brine, dried ( $\text{Na}_2\text{SO}_4$ ) and concentrated under reduced pressure.

Purification by flash column chromatography on silica gel ( $\text{SiO}_2$ : petroleum ether/ethyl acetate, 3:1) gave **9b** (76 mg, 0.41 mmol, 86%) as a colorless oil.

**$^1\text{H}$  NMR (400 MHz,  $\text{CDCl}_3$ )**  $\delta$  5.52 (dtt,  $J = 10.4, 7.3, 1.5$  Hz, 1H), 5.42 – 5.30 (m, 1H), 4.07 (t,  $J = 7.0$  Hz, 2H), 3.66 (t,  $J = 6.5$  Hz, 2H), 2.39 (qd,  $J = 7.1, 1.5$  Hz, 2H), 2.14 – 2.07 (m, 2H), 2.05 (s, 3H), 1.65 (s, 1H), 1.63 – 1.54 (m, 2H), 1.45 (qd,  $J = 9.8, 8.8, 5.8$  Hz, 2H), 1.28 (d,  $J = 11.2$  Hz, 1H).

**$^{13}\text{C}$  NMR (101 MHz,  $\text{CDCl}_3$ )**  $\delta$  171.21, 132.50, 124.72, 63.95, 62.74, 32.26, 26.98, 26.83, 25.69, 20.98.

**HRMS (ESI)** Calcd. for  $\text{C}_{10}\text{H}_{18}\text{NaO}_3^+[\text{M}+\text{Na}]^+$ : 209.1148, Found: 209.1148.

## V. $^1\text{H}$ and $^{13}\text{C}$ NMR spectra for compounds

### $^1\text{H}$ NMR (400 MHz, $\text{CDCl}_3$ ) of compound **4**

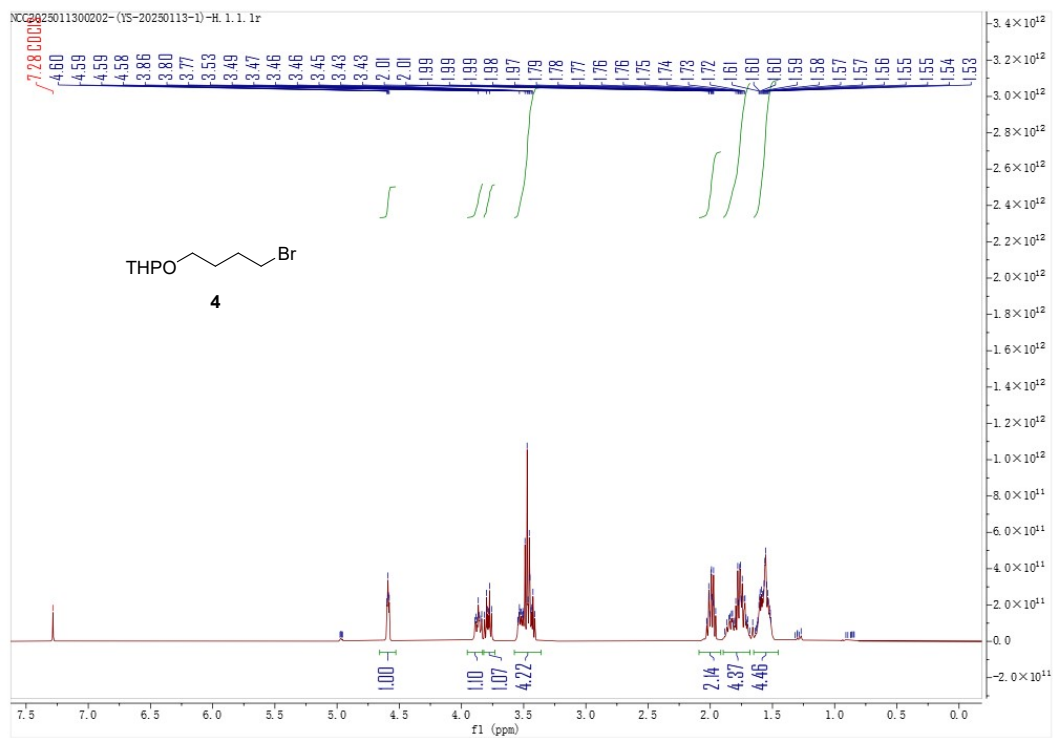

### $^{13}\text{C}$ NMR (101 MHz, $\text{CDCl}_3$ ) of compound **4**

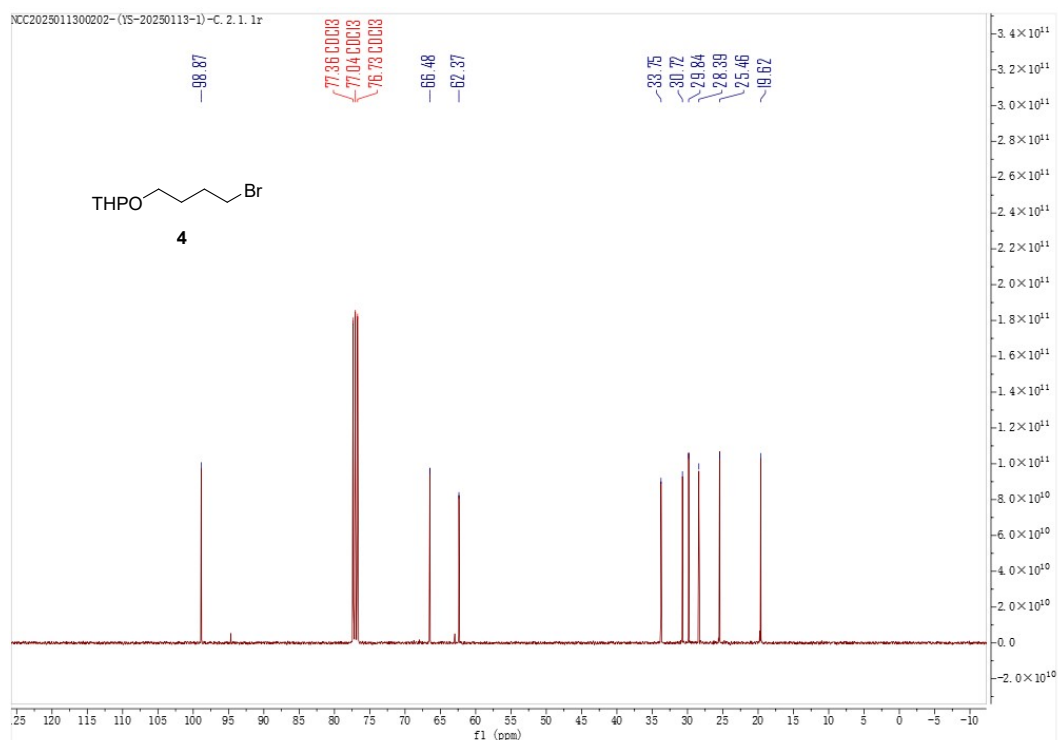

$^1\text{H}$  NMR (400 MHz,  $\text{CDCl}_3$ ) of compound 6

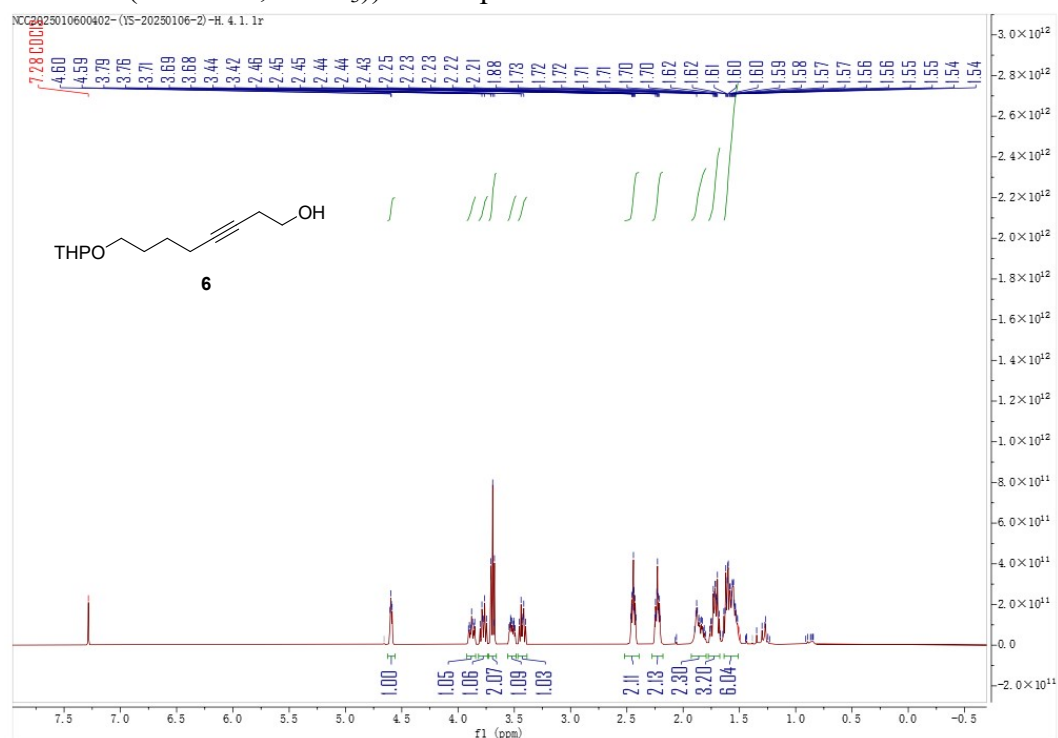

$^{13}\text{C}$  NMR (101 MHz,  $\text{CDCl}_3$ ) of compound 6

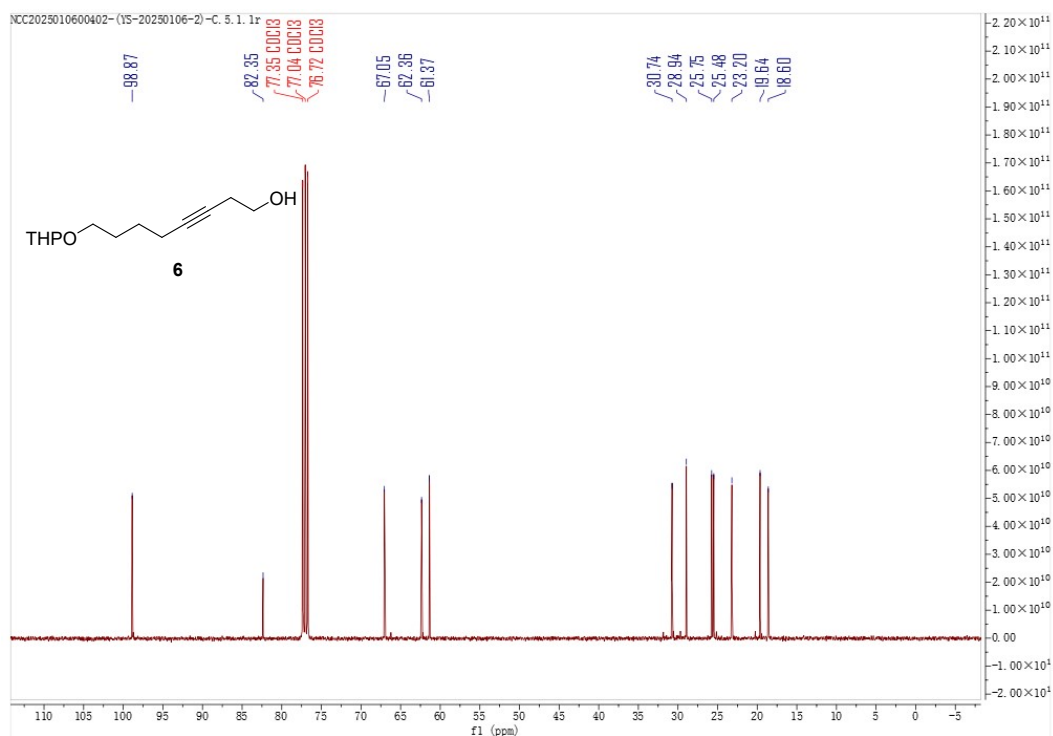

<sup>1</sup>H NMR (400 MHz, CDCl<sub>3</sub>) of compound 7

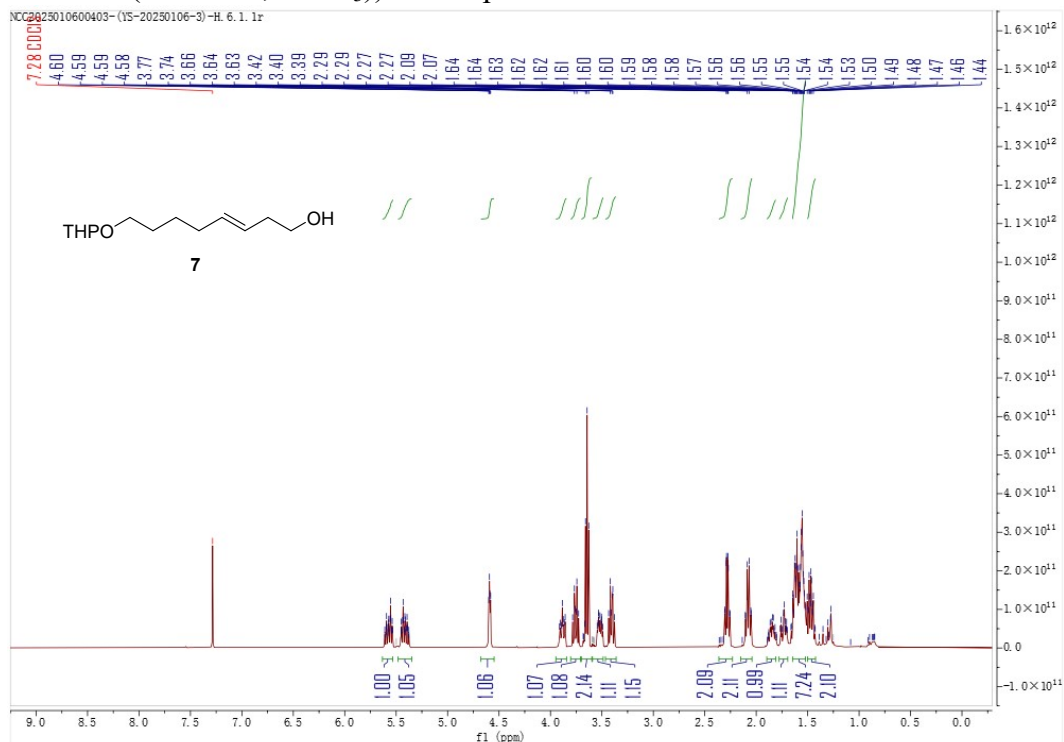

<sup>13</sup>C NMR (101 MHz, CDCl<sub>3</sub>) of compound 7

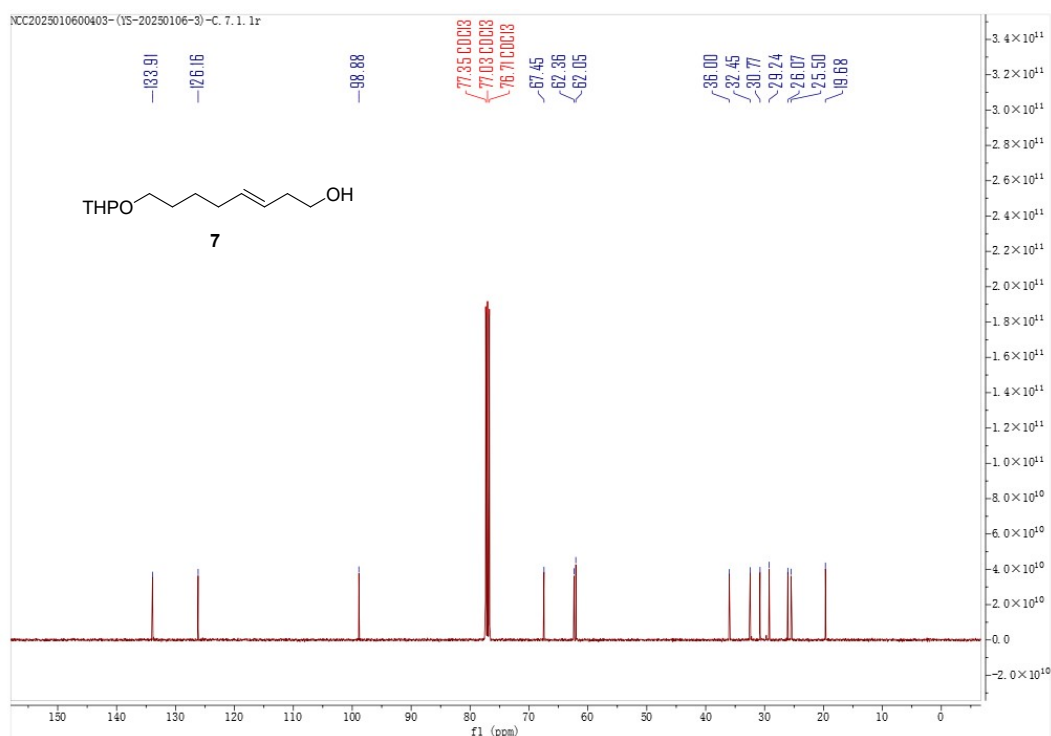

<sup>1</sup>H NMR (400 MHz, CDCl<sub>3</sub>) of compound 8

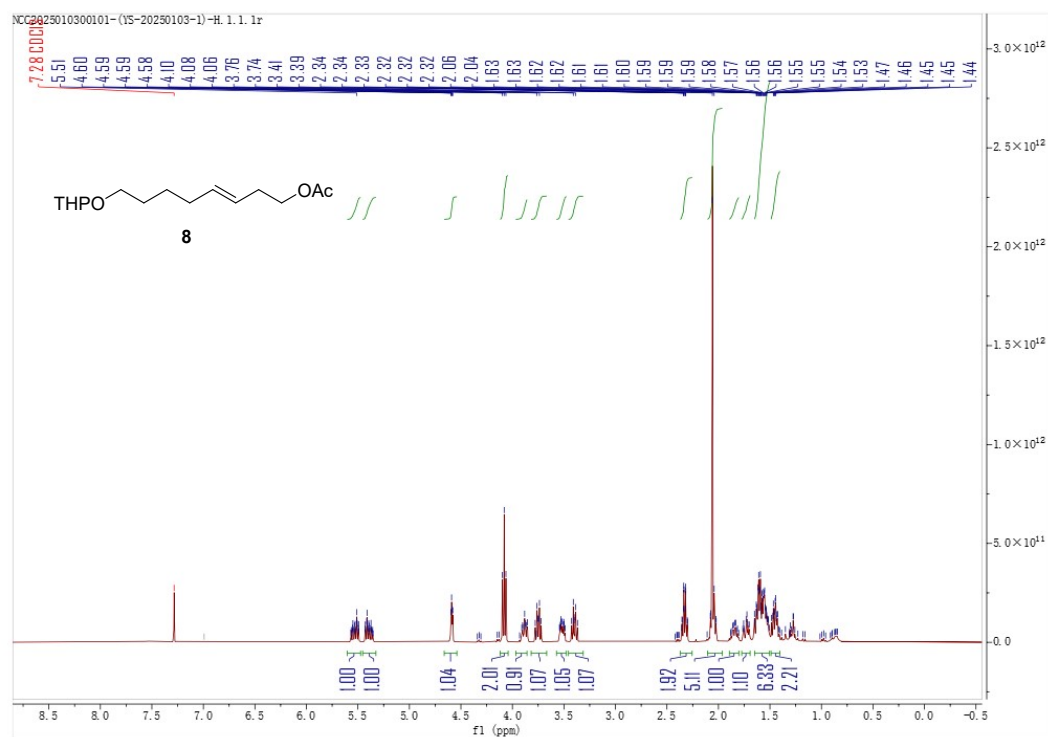

<sup>13</sup>C NMR (101 MHz, CDCl<sub>3</sub>) of compound 8

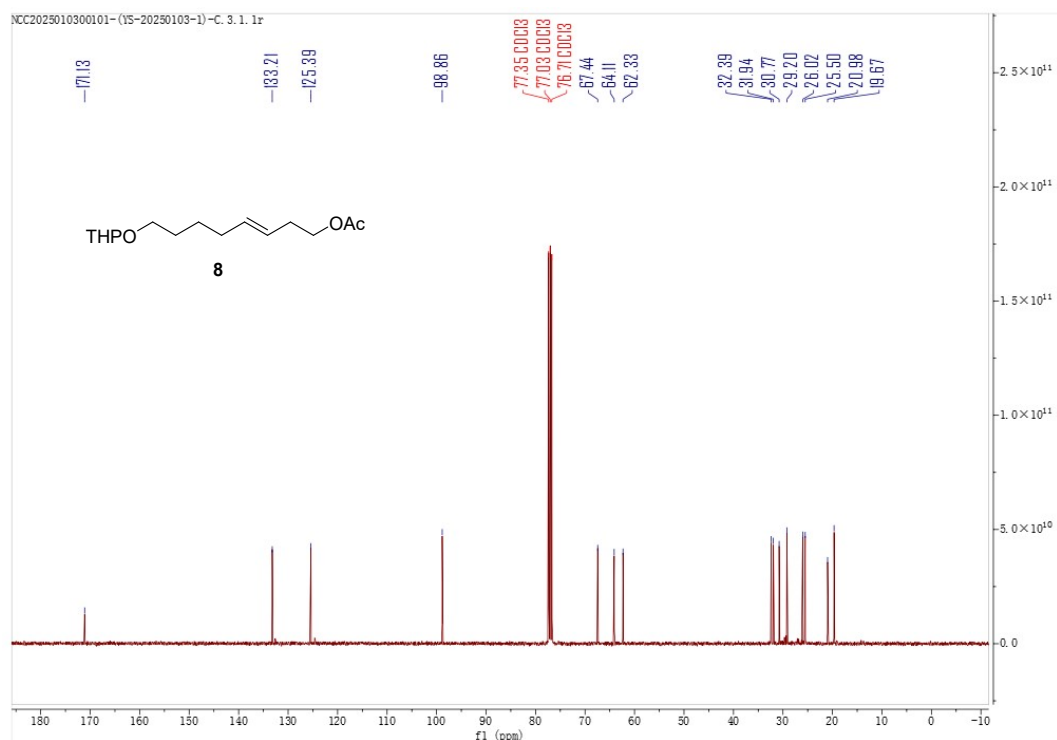

<sup>1</sup>H NMR (400 MHz, CDCl<sub>3</sub>) of compound **9a**

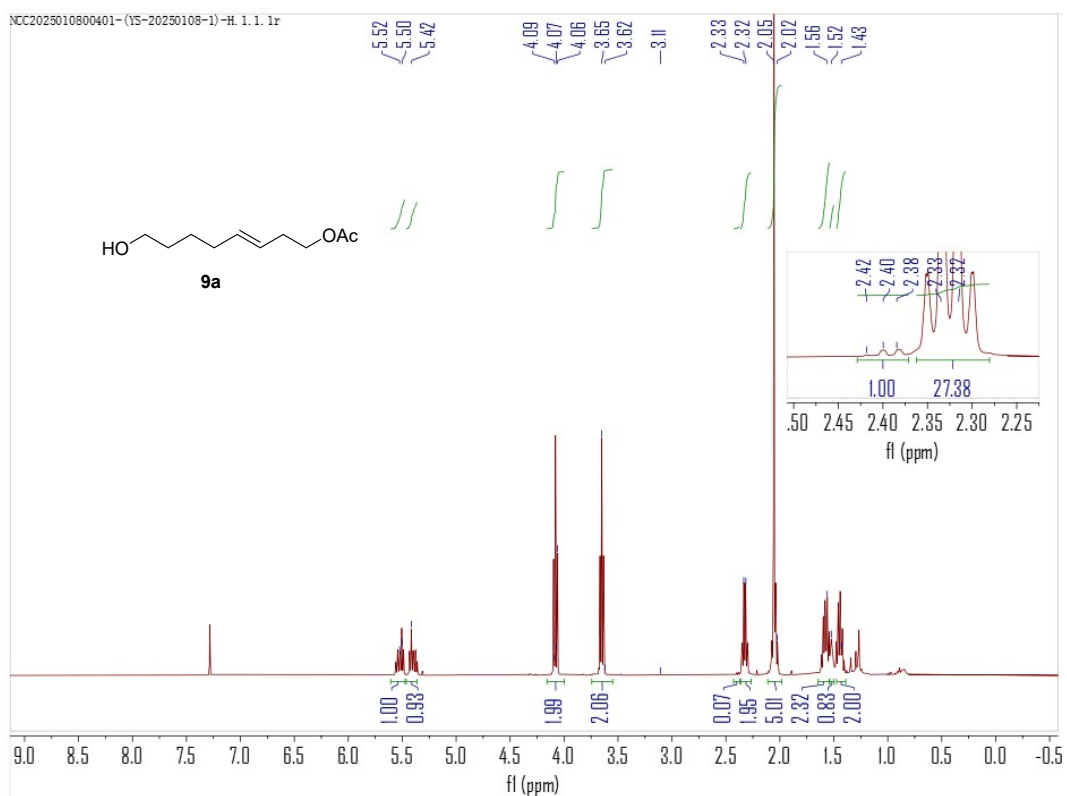



$^{13}\text{C}$  NMR (101 MHz,  $\text{CDCl}_3$ ) of compound **9a**

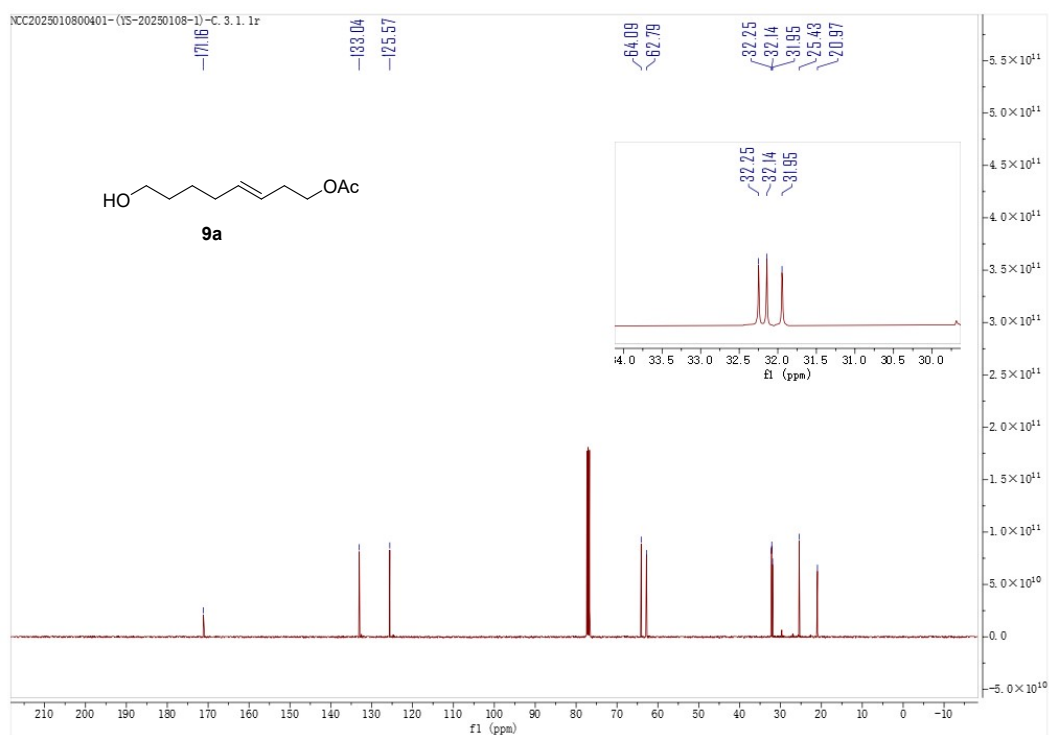

$^1\text{H}$  NMR (400 MHz,  $\text{CDCl}_3$ ) of compound **10**

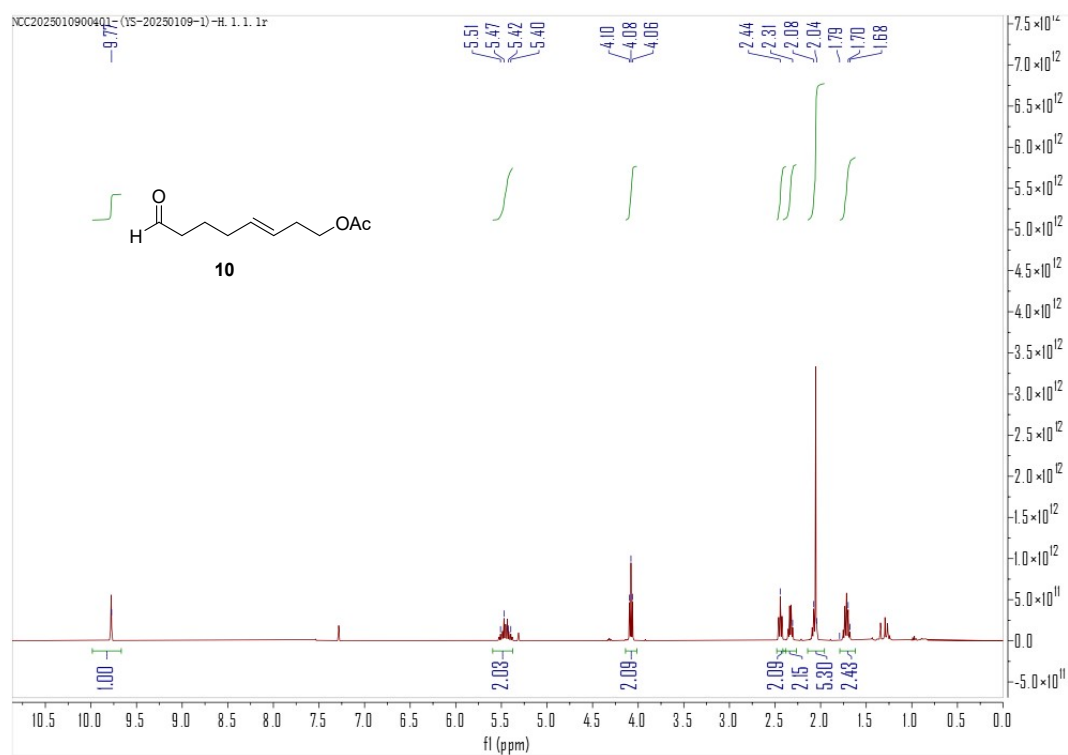

<sup>13</sup>C NMR (101 MHz, CDCl<sub>3</sub>) of compound **10**

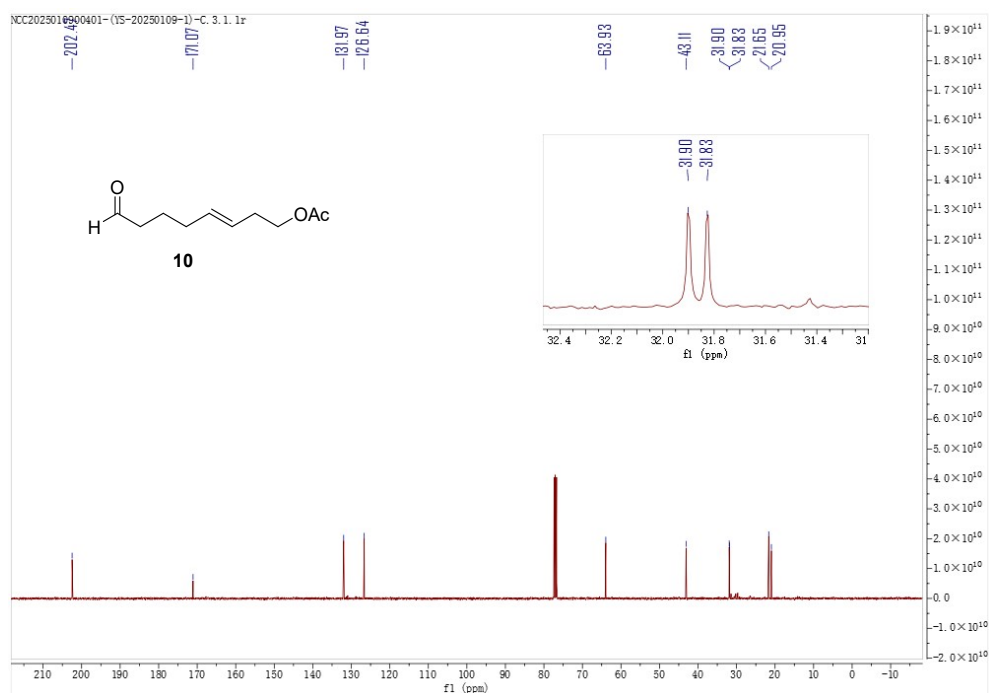

<sup>1</sup>H NMR (400 MHz, CDCl<sub>3</sub>) of compound **2**

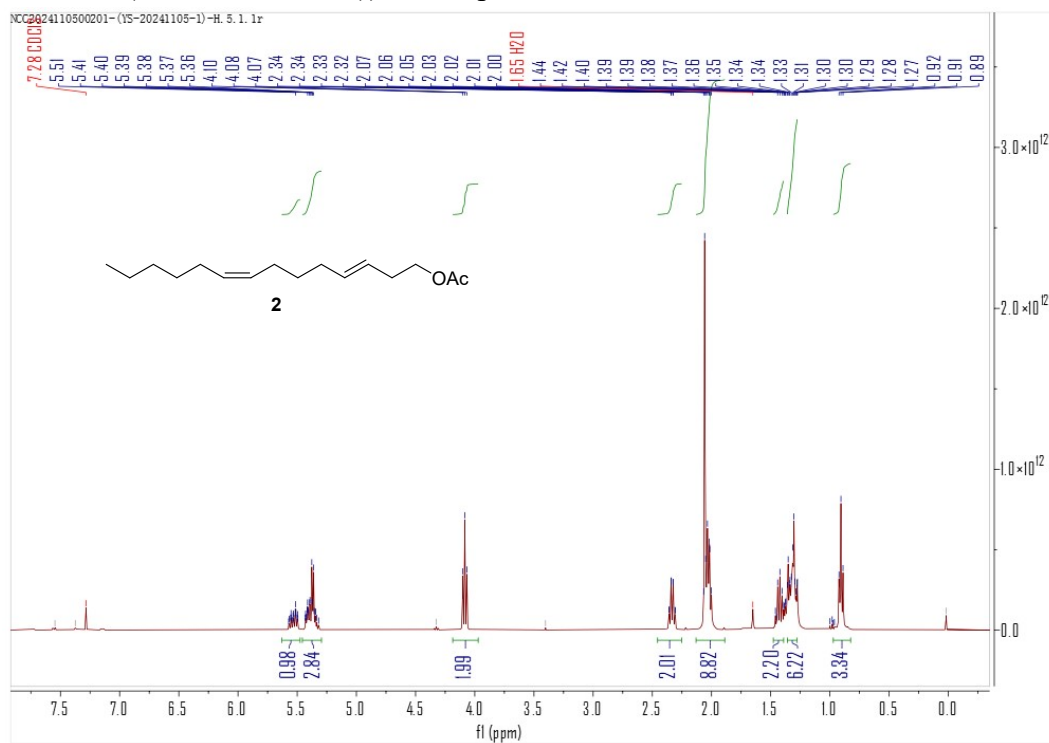

<sup>13</sup>C NMR (101 MHz, CDCl<sub>3</sub>) of compound **2**

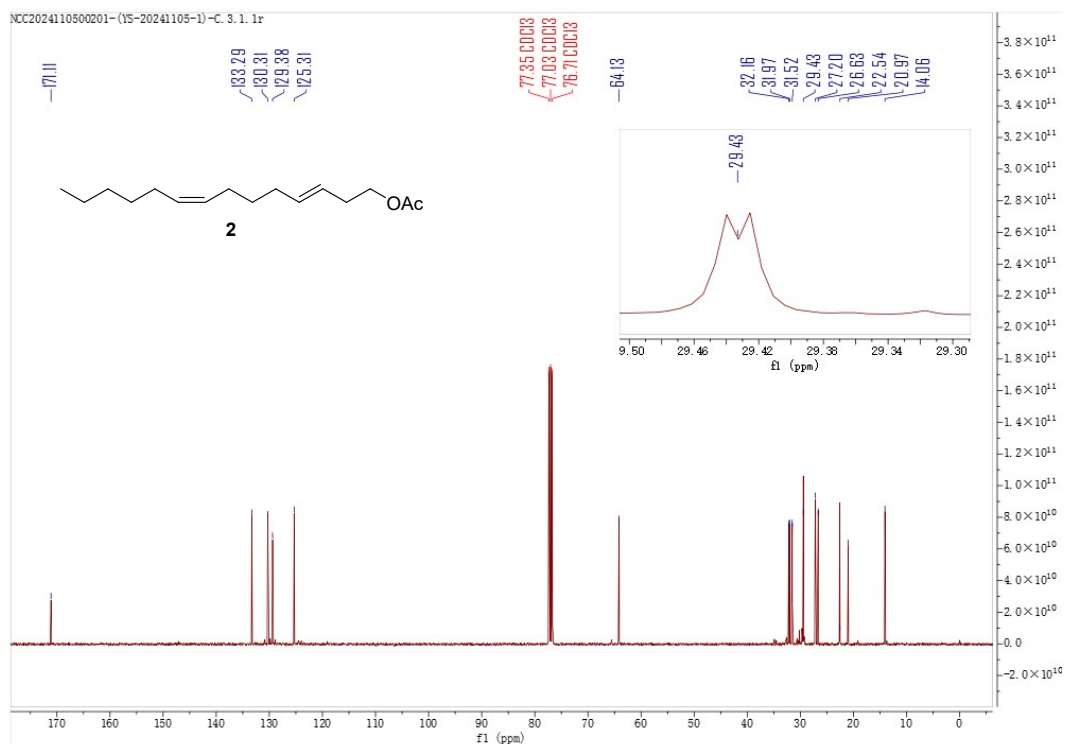

<sup>1</sup>H NMR (400 MHz, CDCl<sub>3</sub>) of compound 1

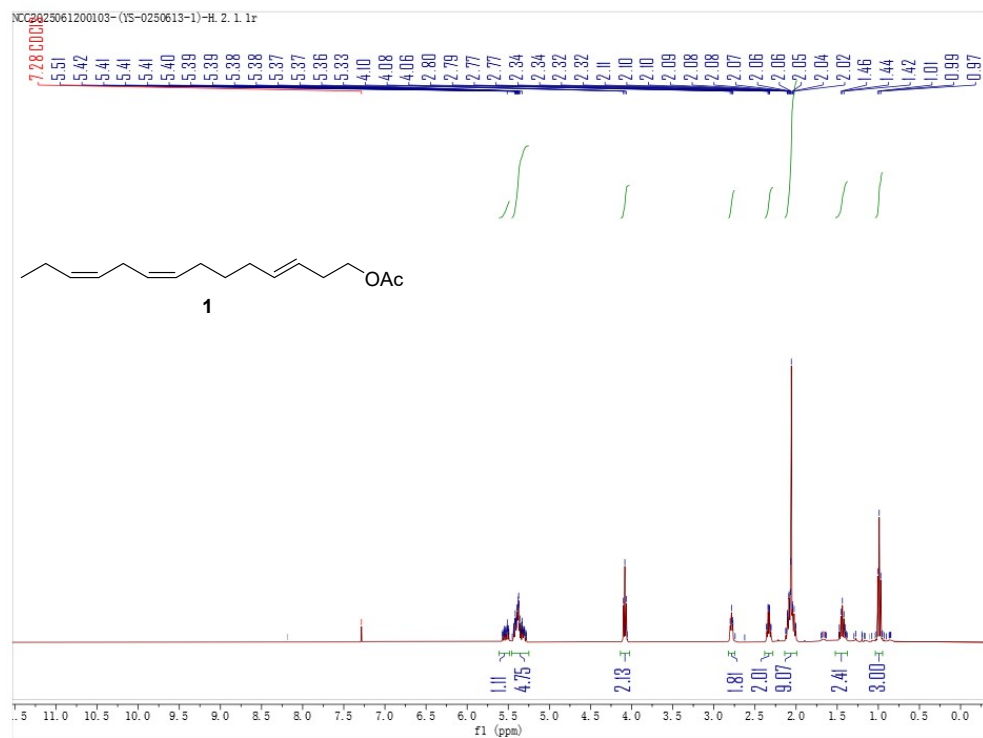

<sup>13</sup>C NMR (101 MHz, CDCl<sub>3</sub>) of compound 1



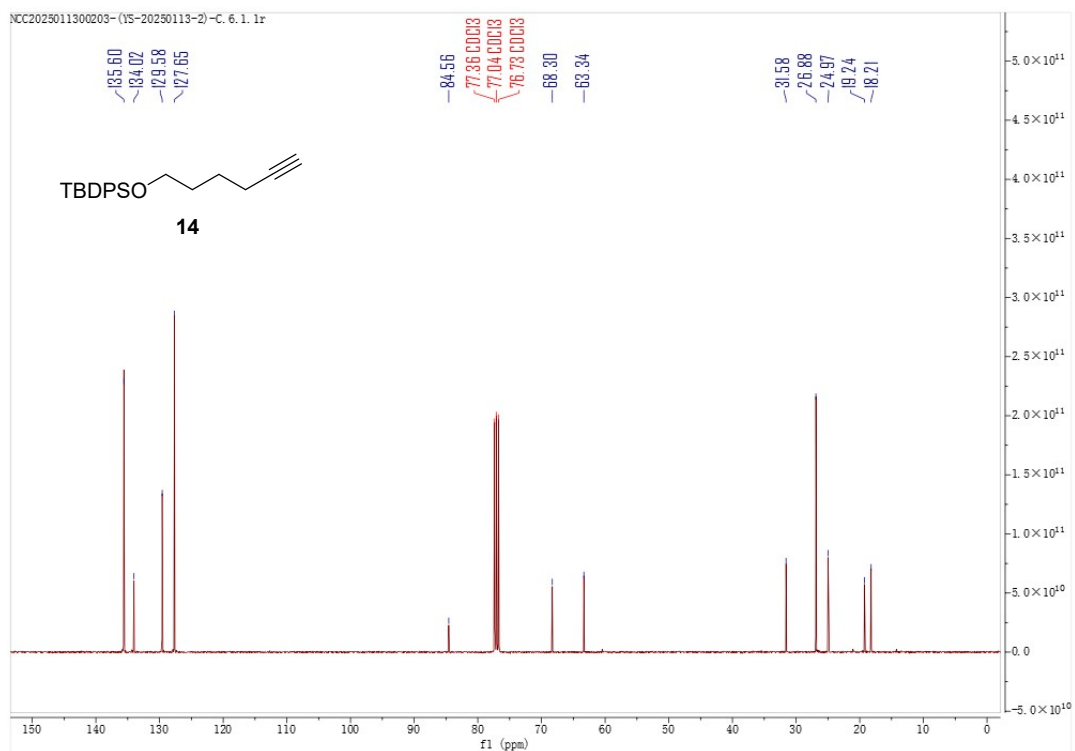

<sup>1</sup>H NMR (400 MHz, CDCl<sub>3</sub>) of compound **15**

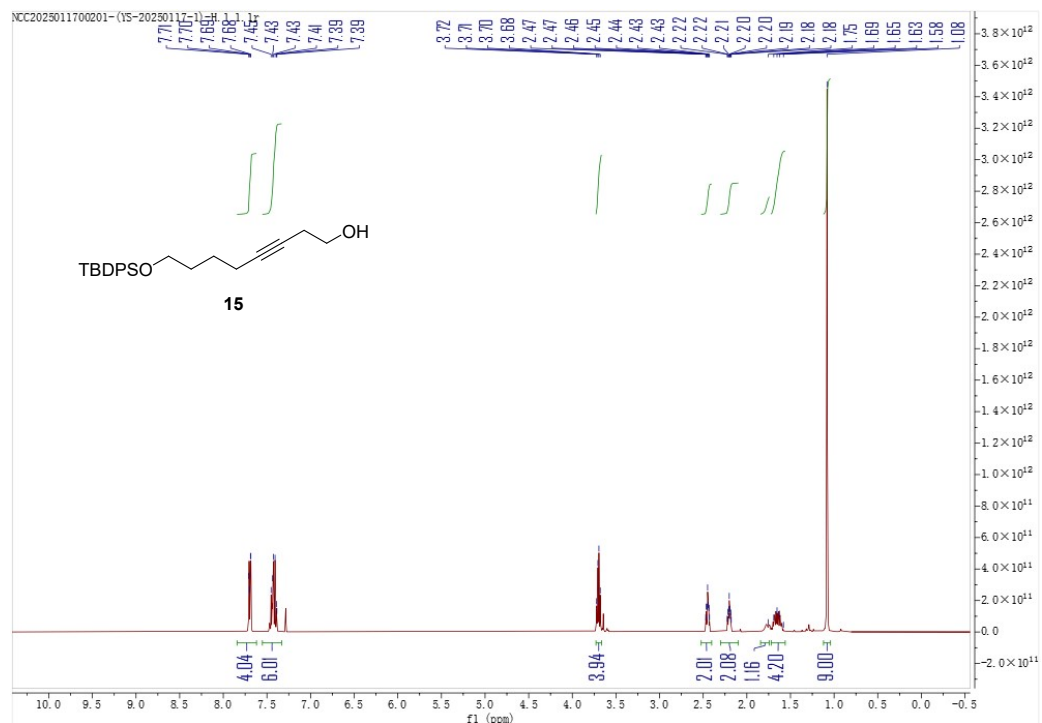

<sup>13</sup>C NMR (101 MHz, CDCl<sub>3</sub>) of compound **15**

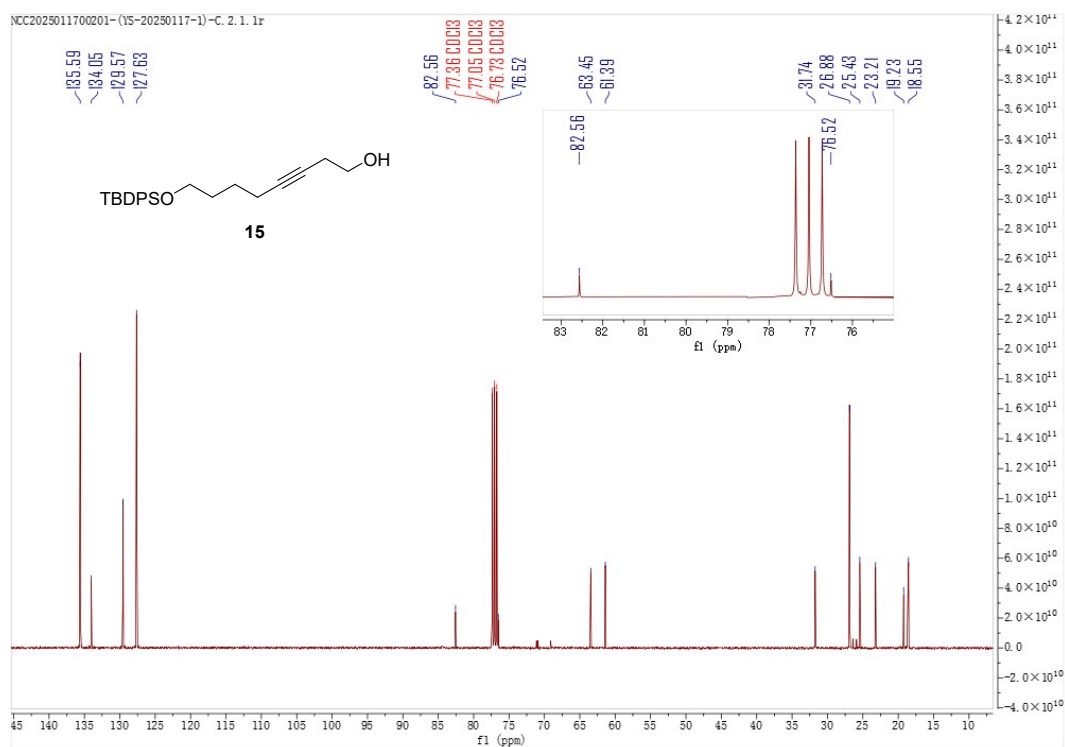

<sup>1</sup>H NMR (400 MHz, CDCl<sub>3</sub>) of compound **16**

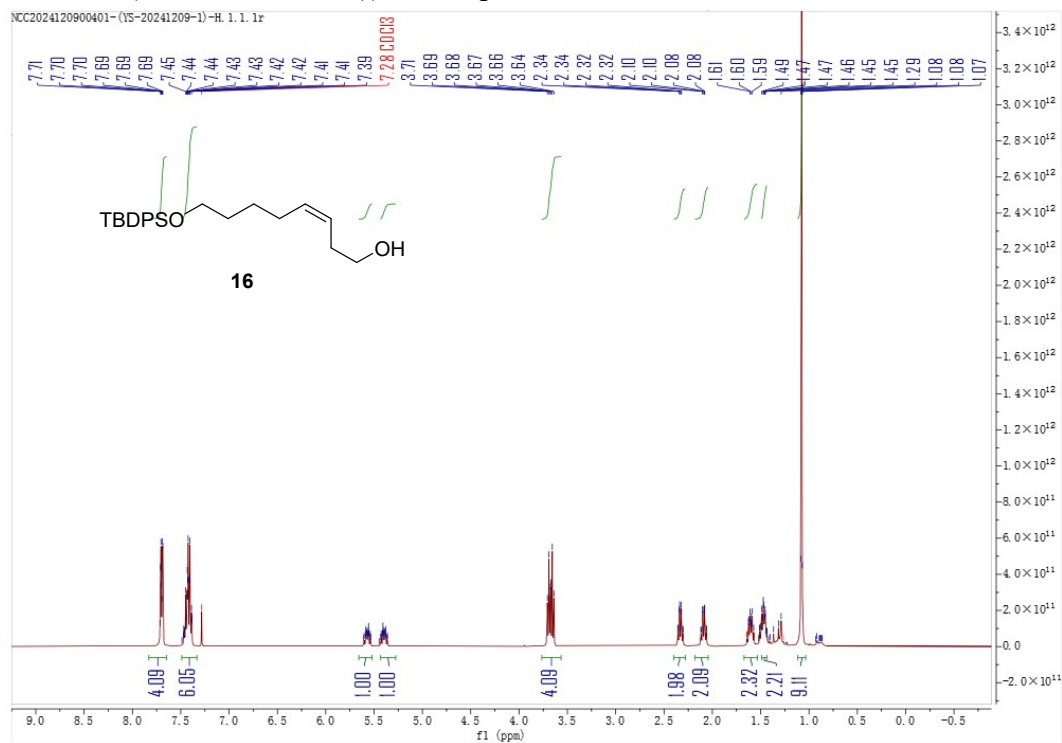

<sup>13</sup>C NMR (101 MHz, CDCl<sub>3</sub>) of compound **16**

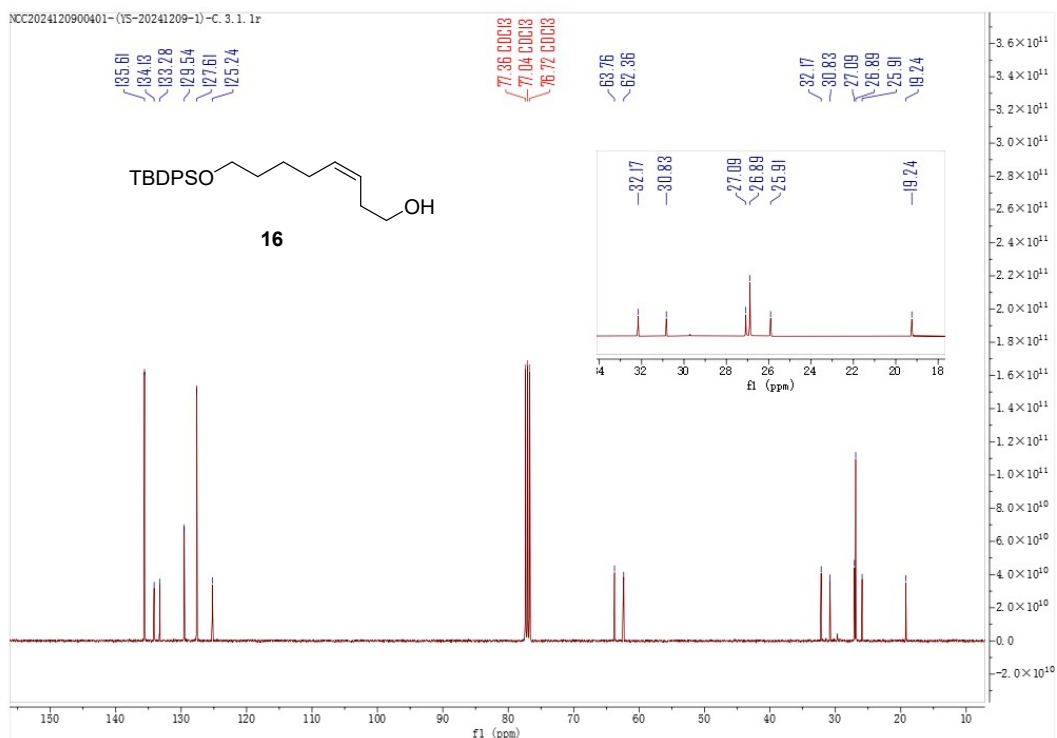

<sup>1</sup>H NMR (400 MHz, CDCl<sub>3</sub>) of compound **17**

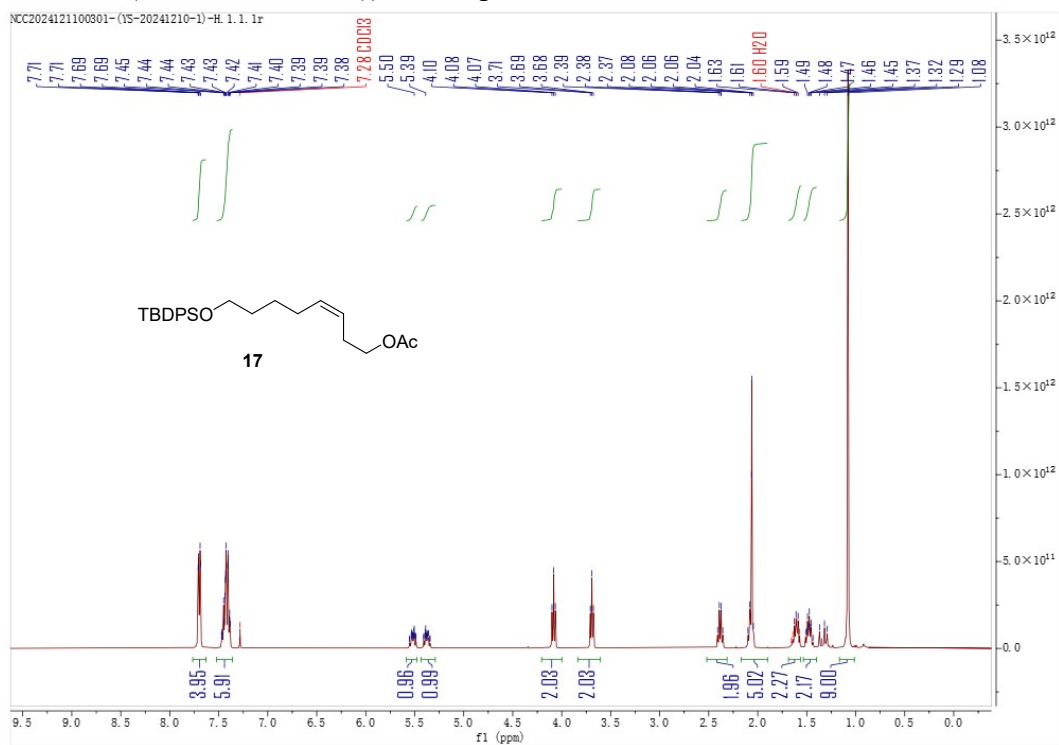

<sup>13</sup>C NMR (101 MHz, CDCl<sub>3</sub>) of compound **17**

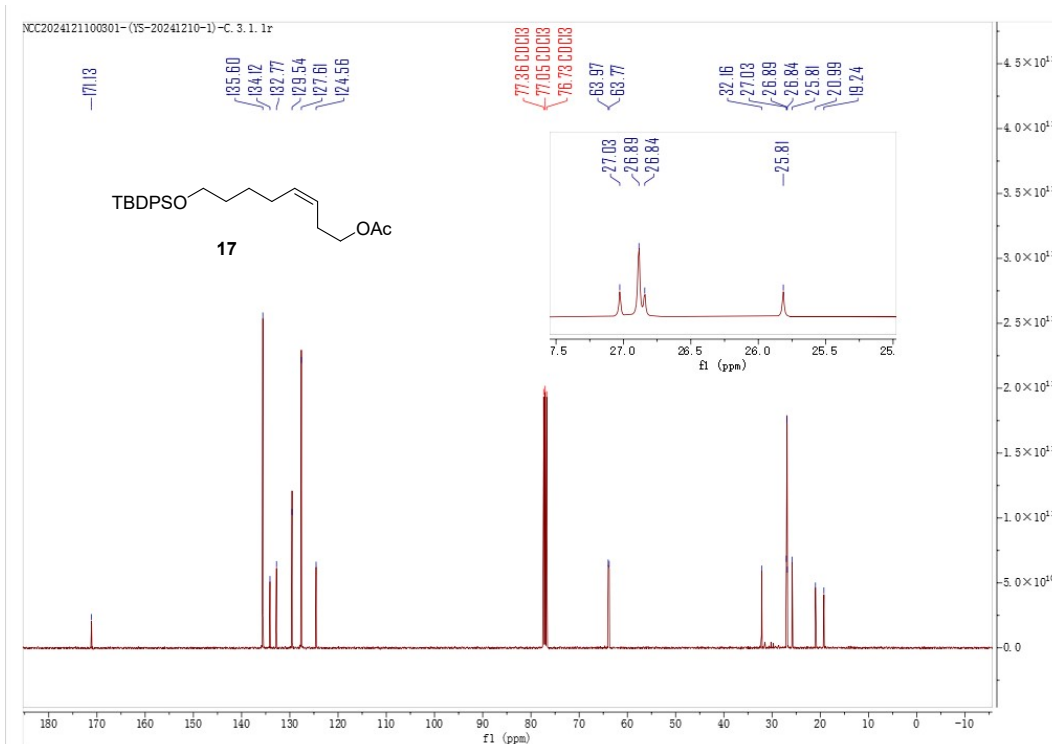<sup>1</sup>H NMR (400 MHz, CDCl<sub>3</sub>) of compound **9b**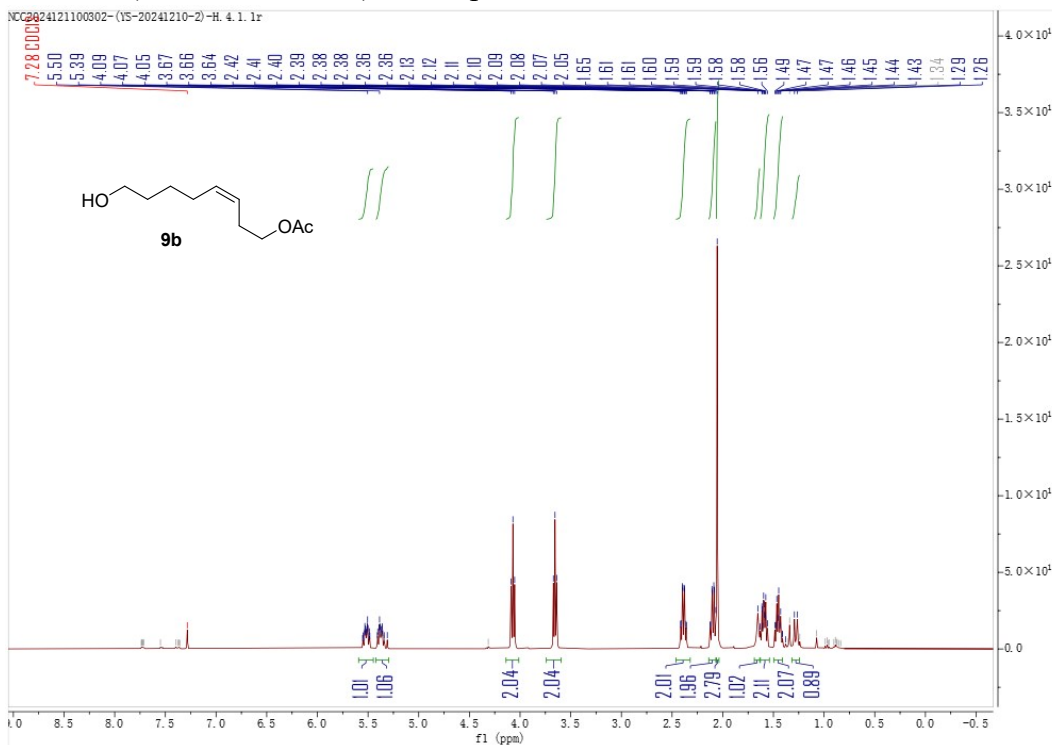

<sup>13</sup>C NMR (101 MHz, CDCl<sub>3</sub>) of compound **9b**



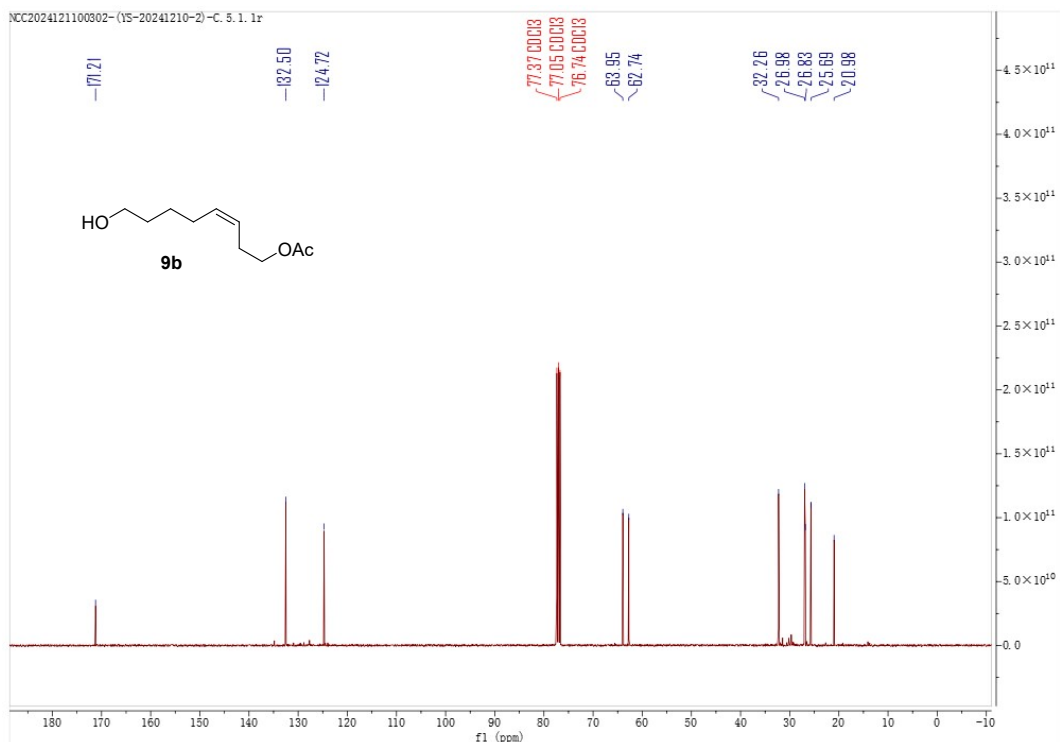

## VI. Gas chromatography and HRMS of compounds **1** and **2**

Gas chromatography of compounds **1** (Agilent 8860, HP-5: 30 m x 320  $\mu$ m x 0,25  $\mu$ m)

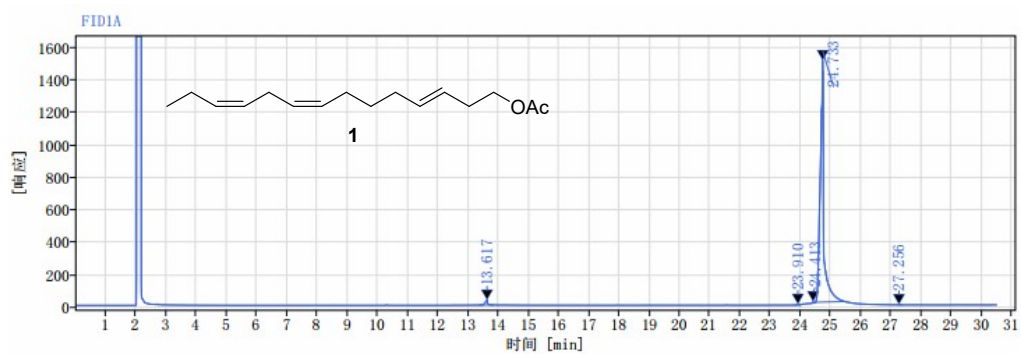

| 信号:        | FID1A |          |          |         |       |    |
|------------|-------|----------|----------|---------|-------|----|
| 保留时间 [min] | 类型    | 峰宽 [min] | 峰面积      | 峰高      | 峰面积%  | 名称 |
| 13.617     | BB    | 0.49     | 169.21   | 30.20   | 1.35  |    |
| 23.910     | MM m  | 0.20     | 7.65     | 3.78    | 0.06  |    |
| 24.413     | MM m  | 0.15     | 5.93     | 7.55    | 0.05  |    |
| 24.733     | MM m  | 0.97     | 12363.22 | 1485.50 | 98.50 |    |
| 27.256     | MM m  | 0.16     | 6.03     | 1.82    | 0.05  |    |
|            |       | 总和       | 12552.05 |         |       |    |

Gas chromatography of compounds **2** (Agilent 8860, HP-5: 30 m x 320  $\mu$ m x 0,25  $\mu$ m)

um)

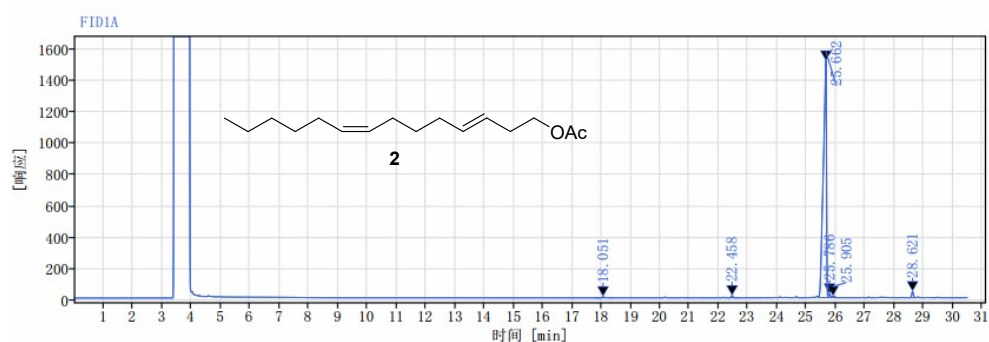

信号: FID1A

| 保留时间<br>[min] | 类型   | 峰宽 [min] | 峰面积      | 峰高      | 峰面积%  | 名称 |
|---------------|------|----------|----------|---------|-------|----|
| 18.051        | MM m | 0.65     | 44.43    | 8.26    | 0.38  |    |
| 22.458        | MM m | 0.55     | 58.22    | 14.10   | 0.50  |    |
| 25.662        | VV   | 0.33     | 11350.53 | 1511.08 | 96.72 |    |
| 25.786        | VB   | 0.13     | 96.30    | 24.29   | 0.82  |    |
| 25.905        | MM m | 0.33     | 33.18    | 8.79    | 0.28  |    |
| 28.621        | BV   | 0.22     | 153.09   | 39.94   | 1.30  |    |
|               |      | 总和       | 11735.74 |         |       |    |

## HRMS of compounds 1

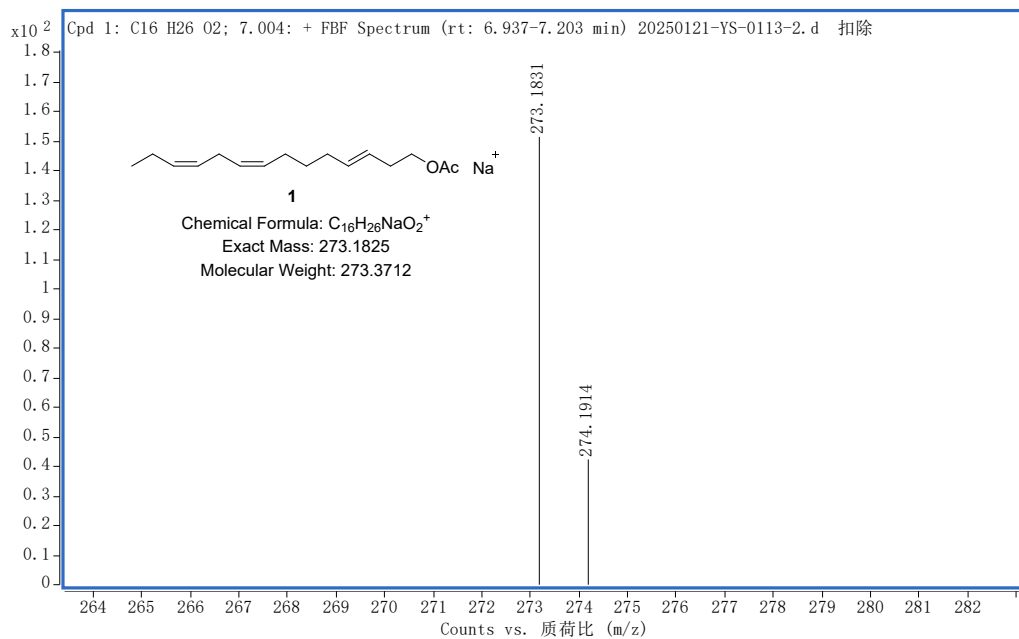

## HRMS of compounds 1

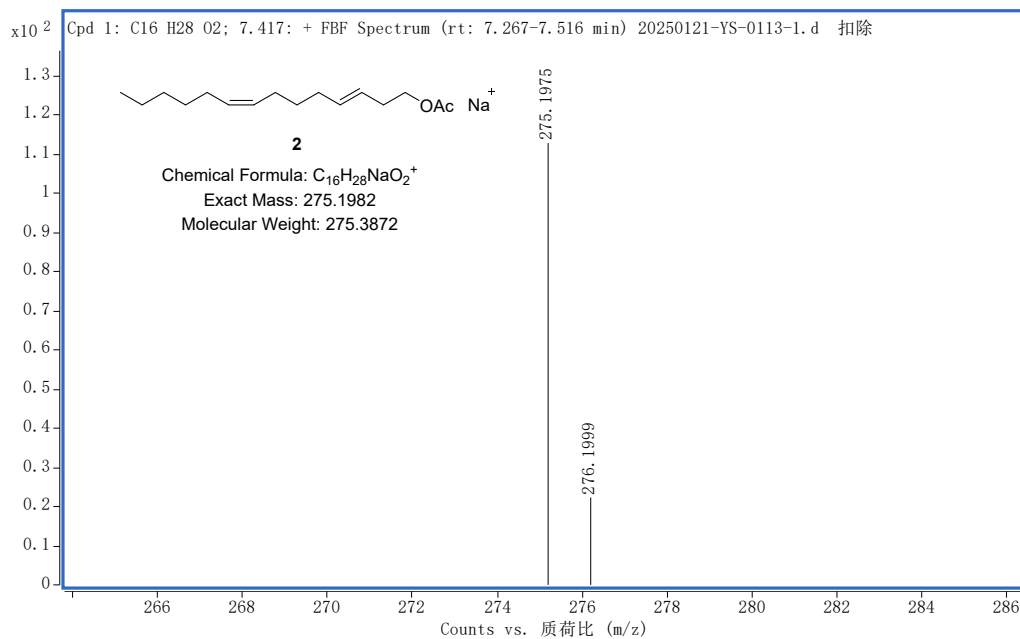

Supplement: d5ra05956a1.pdf [file d5ra05956a1.pdf]
